# Supplementary material
Source: MDPI journal article supplement (https://www.mdpi.com/2624-599X/5/1/19)

# Supplementary graphs

Hanna Autio, Nikolaos-Georgios Vardaxis, Delphine Bard-Hagberg

February 22, 2023

## Contents

|    |                                                                       |    |
|----|-----------------------------------------------------------------------|----|
| 1  | Predicted and simulated expected detected energy                      | 2  |
| 2  | Predicted and simulated expected detected energy to number of rays    | 6  |
| 3  | Predicted and simulated variance of detected energy                   | 9  |
| 4  | Predicted and simulated variance of detected energy to number of rays | 13 |
| 5  | Mean detected energy, iterative and classical algorithm               | 16 |
| 6  | Variance of detected energy, iterative and classical algorithm        | 24 |
| 7  | Reverberation time to number of rays                                  | 32 |
| 8  | Early Decay Time                                                      | 33 |
| 9  | Early decay time to number of rays                                    | 34 |
| 10 | Speech clarity                                                        | 38 |
| 11 | Speech clarity to number of rays                                      | 39 |

# 1 Predicted and simulated expected detected energy

## S1R1

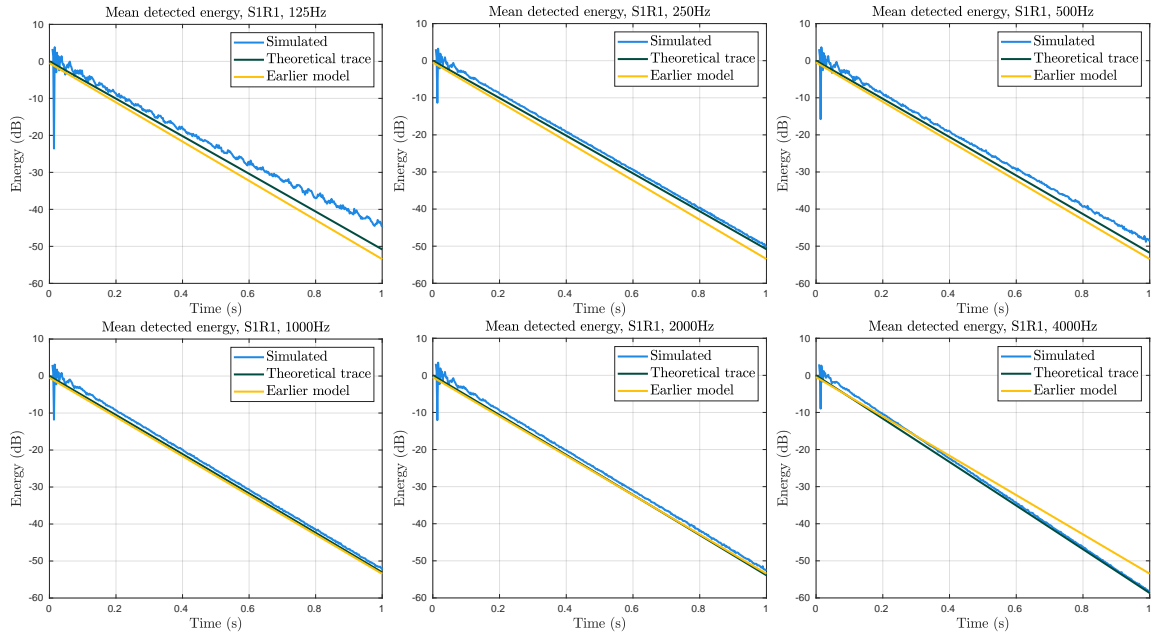

## S1R2

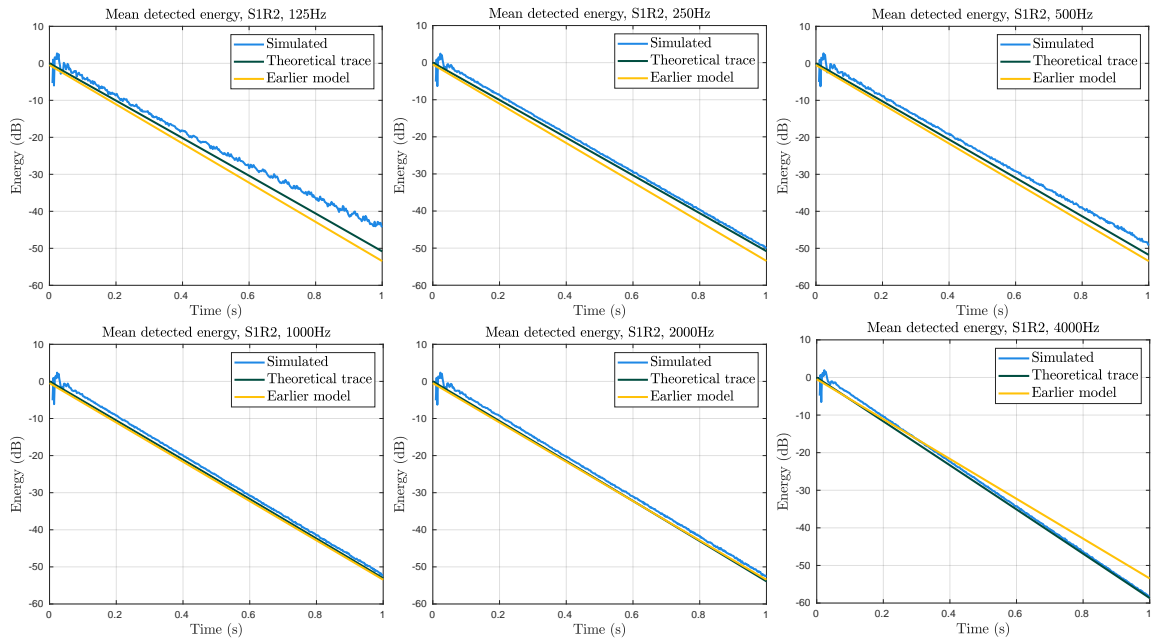

## S1R3

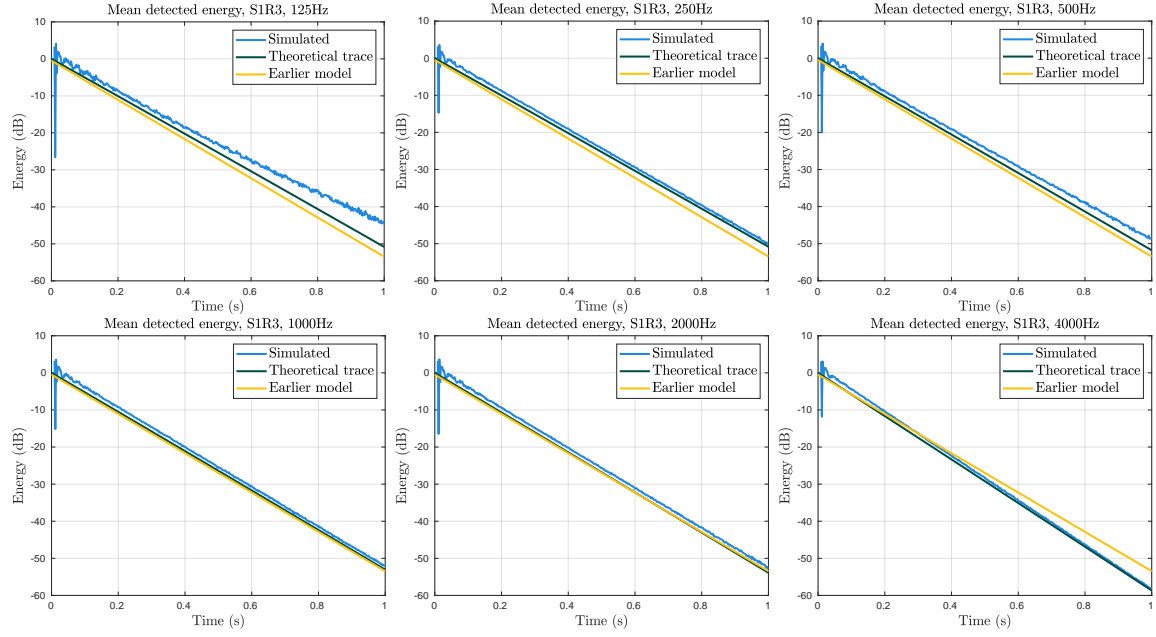

## S1R4

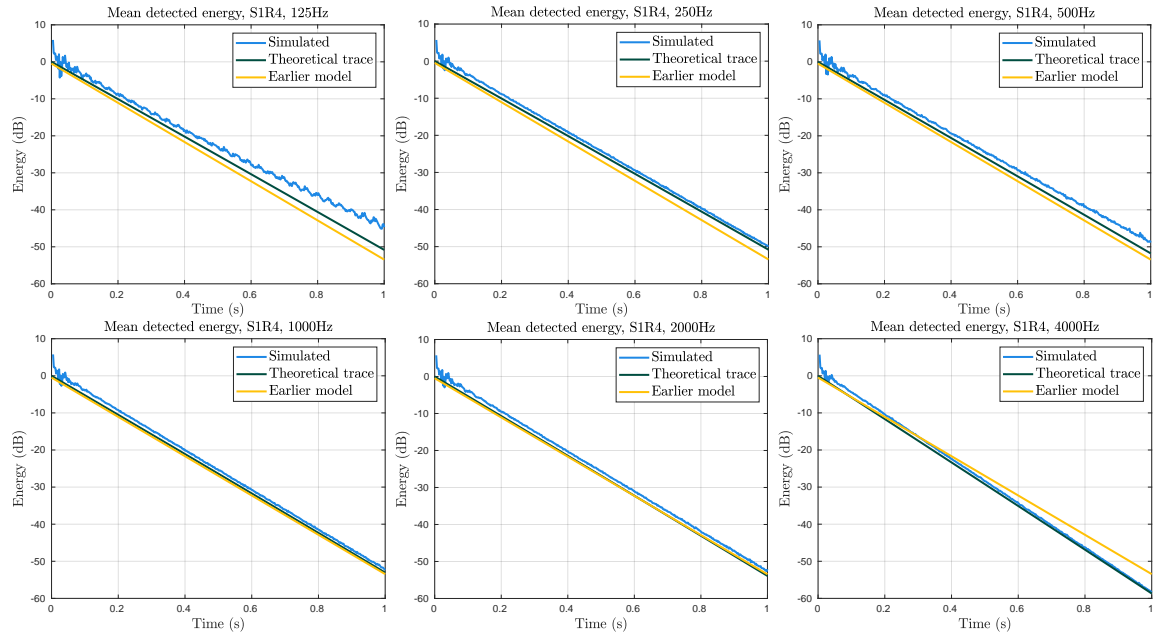

## S2R1

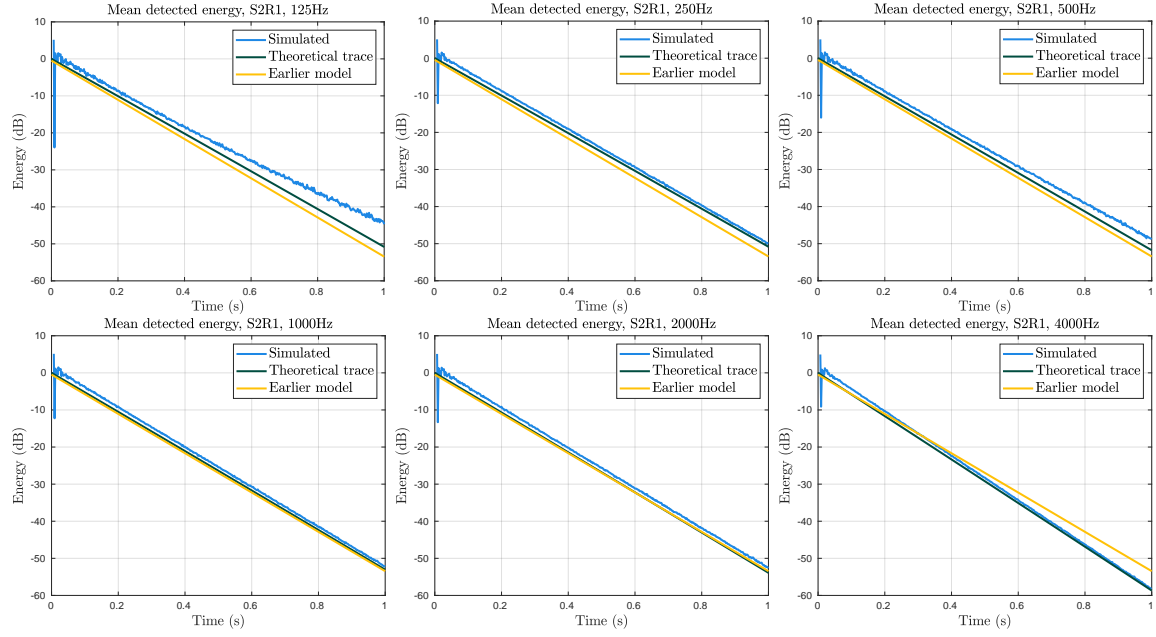

## S2R2

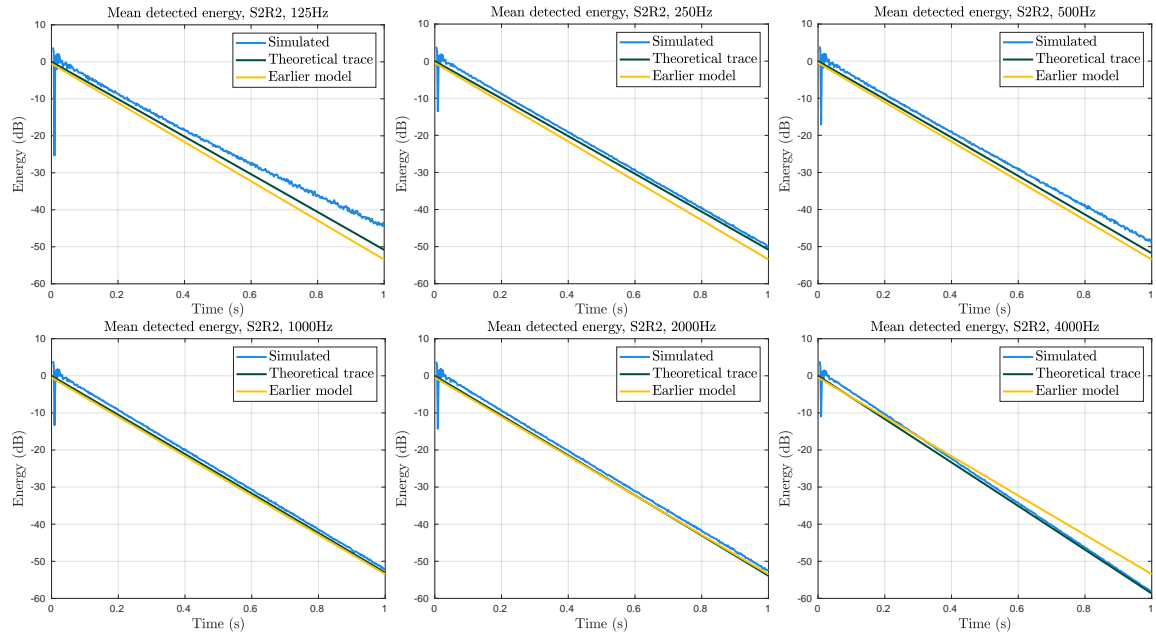

## S2R3



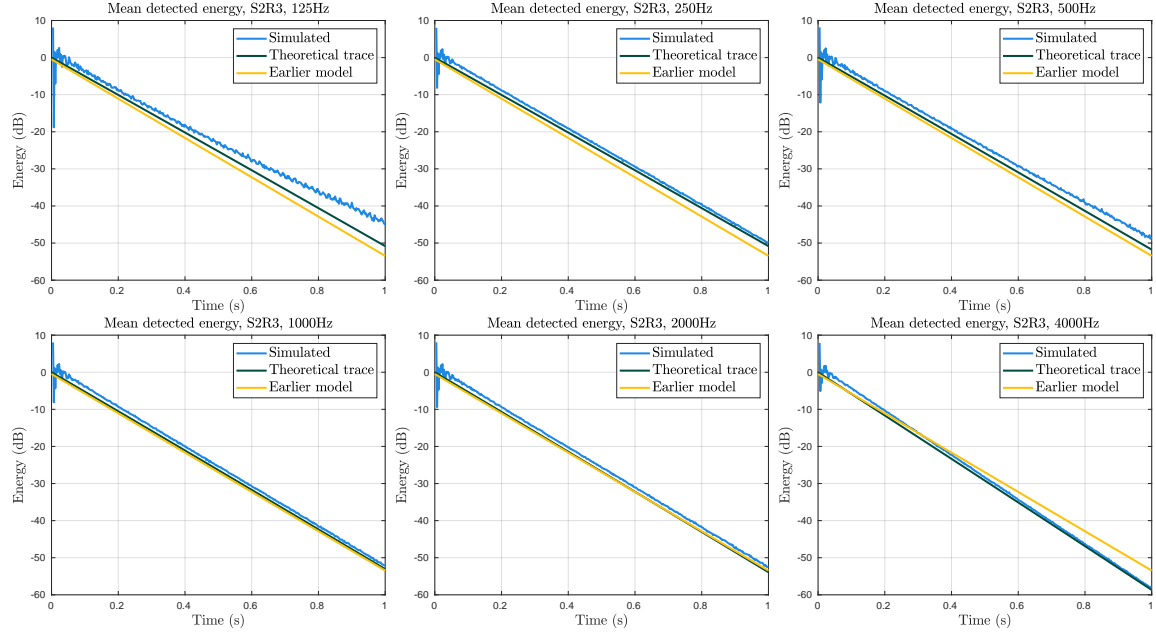

## S2R4

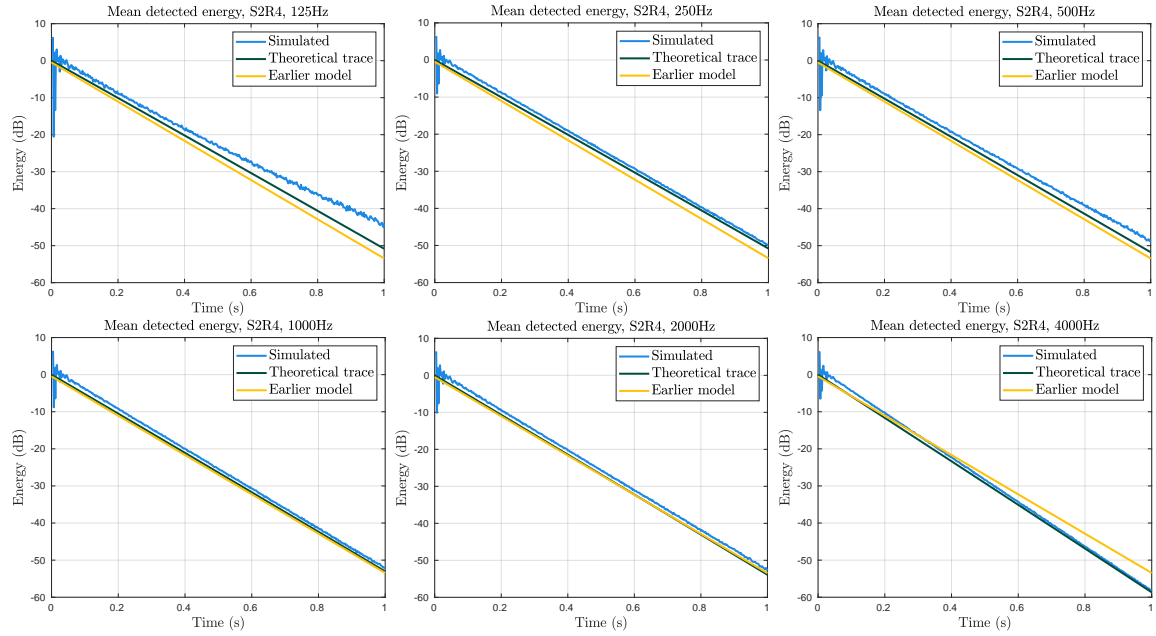

## 2 Predicted and simulated expected detected energy to number of rays

### S1R1

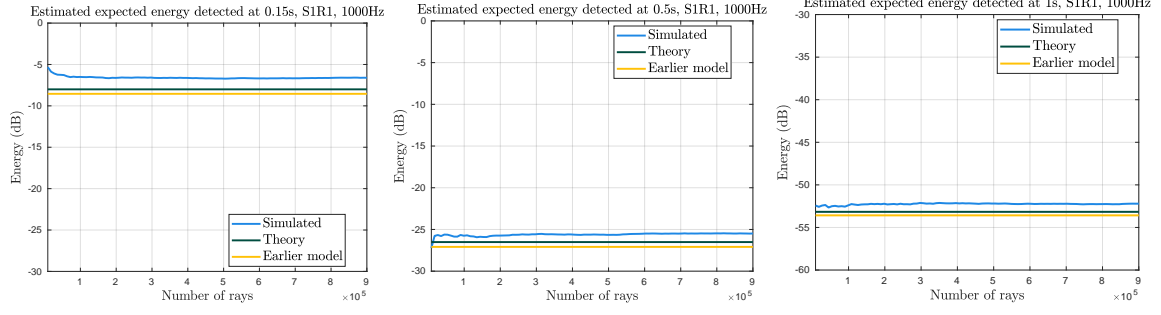

### S1R2

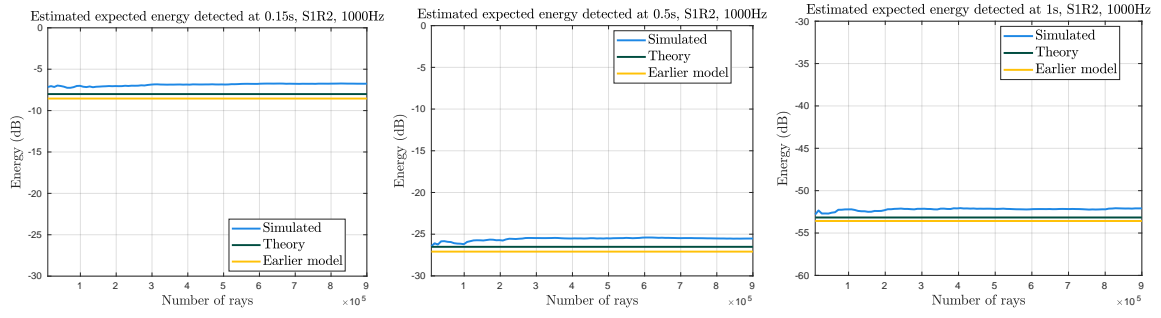

### S1R3

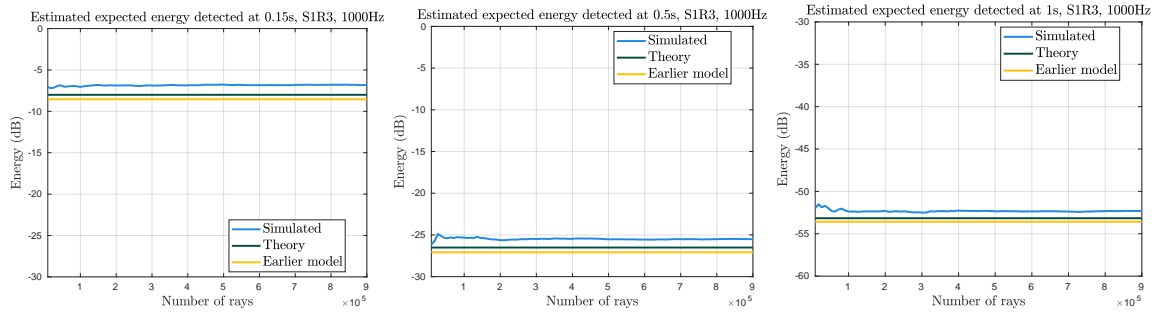

## S1R4

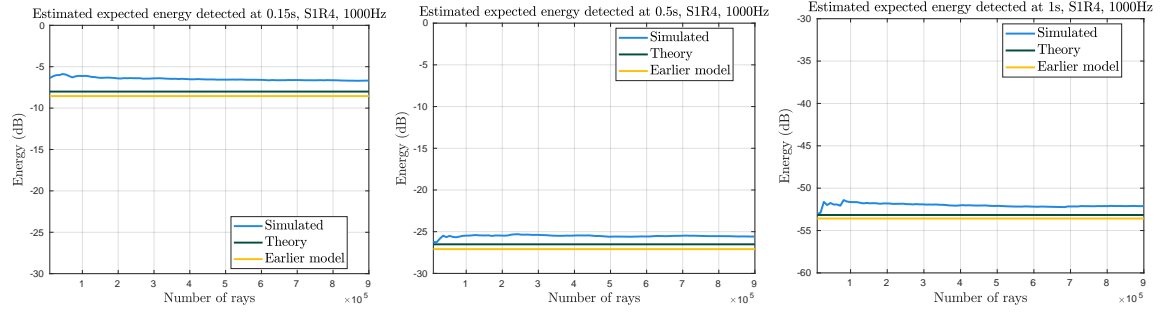

## S2R1

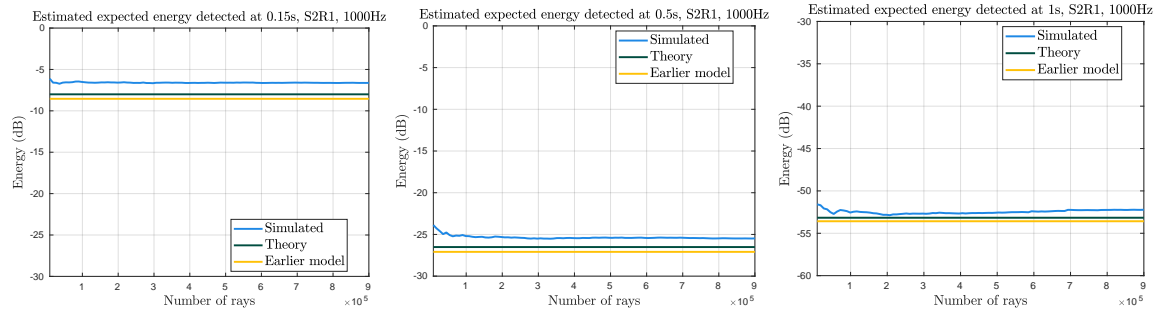

## S2R2

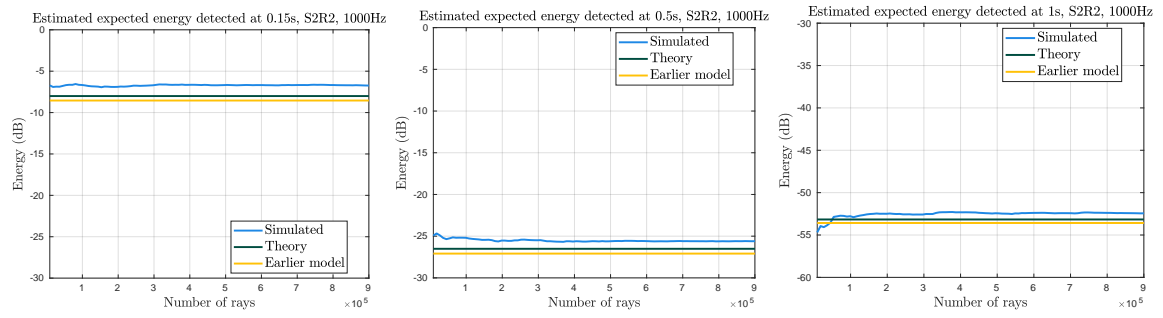

## S2R3

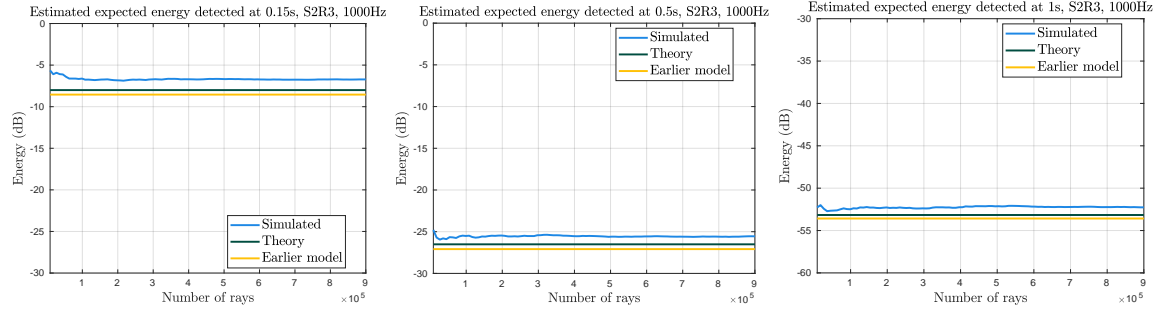

## S2R4

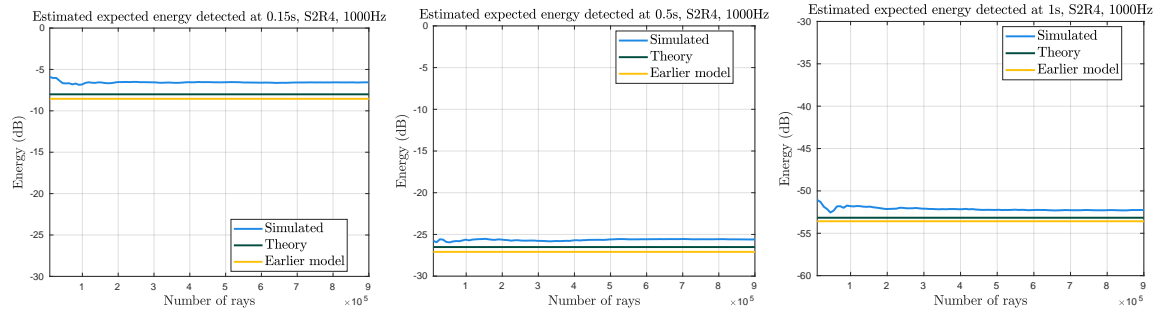

### 3 Predicted and simulated variance of detected energy

#### S1R1

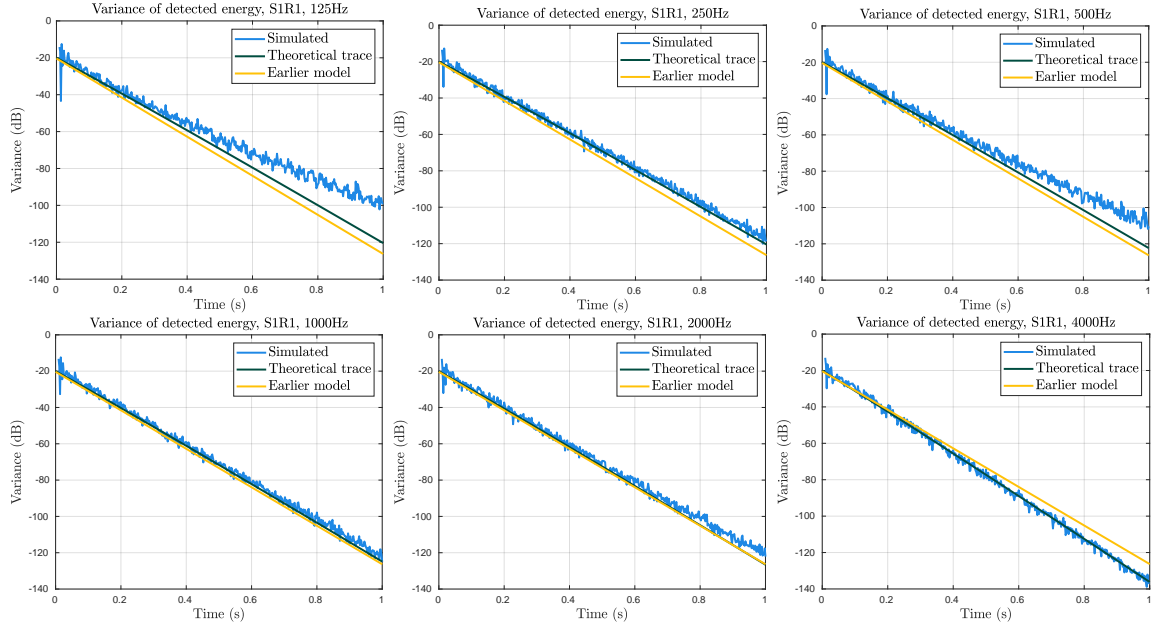

#### S1R2

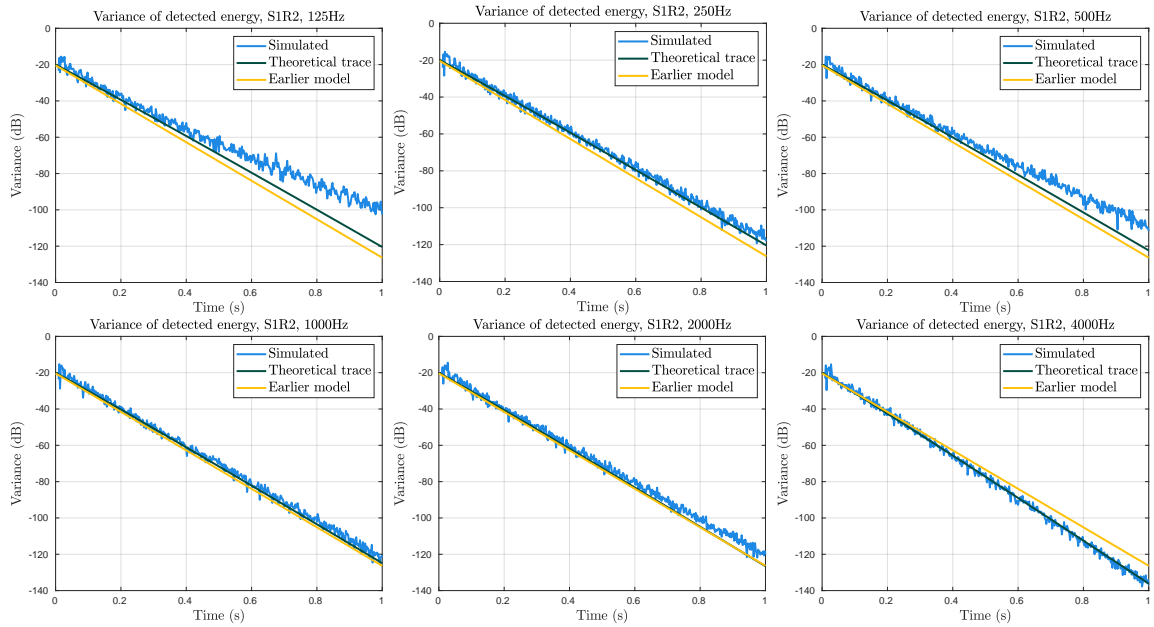

## S1R3

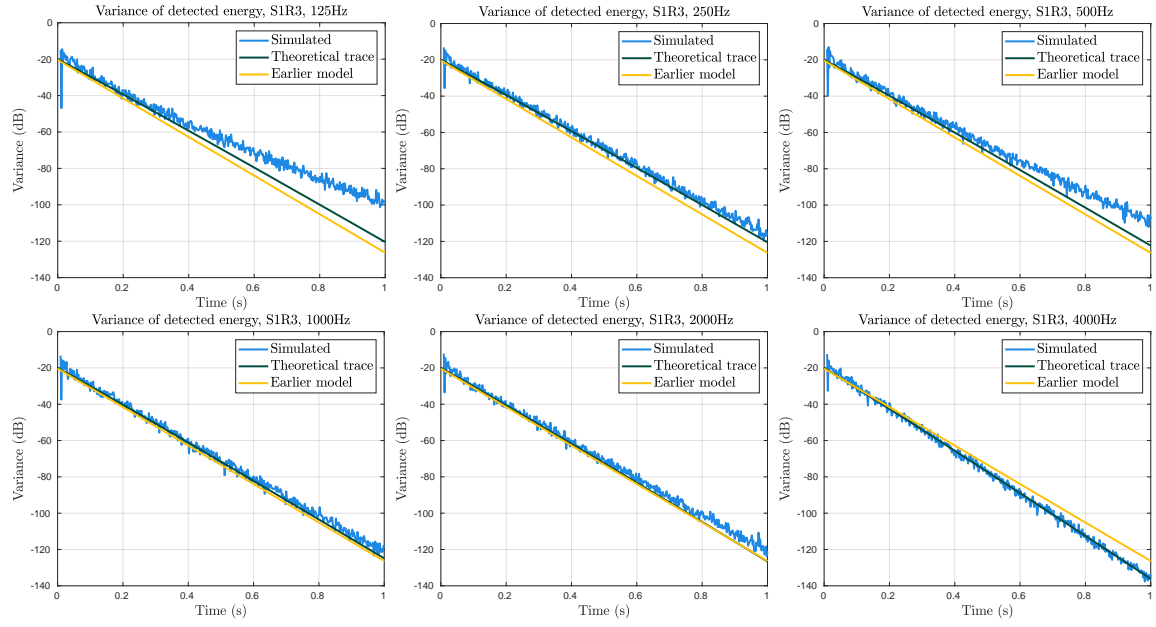

## S1R4

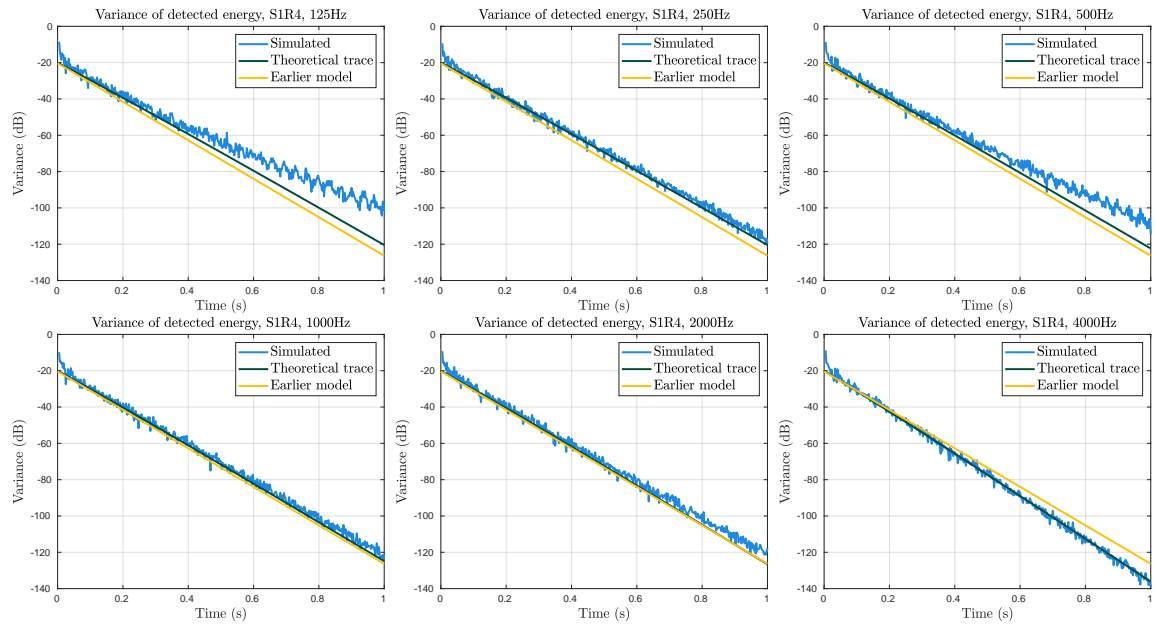

## S2R1

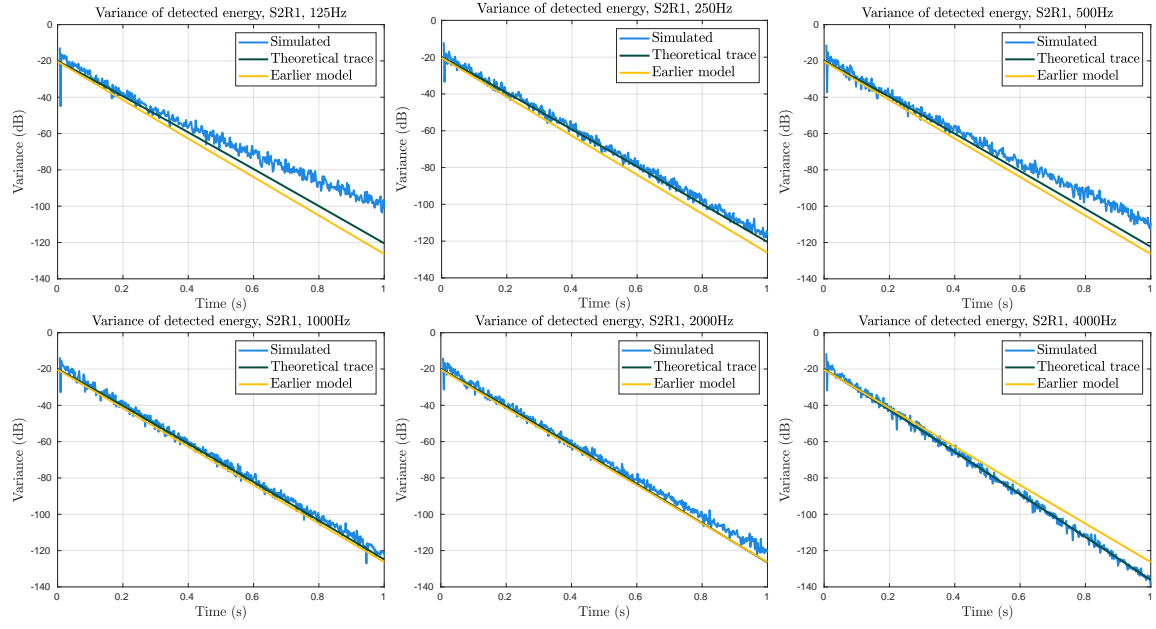

## S2R2

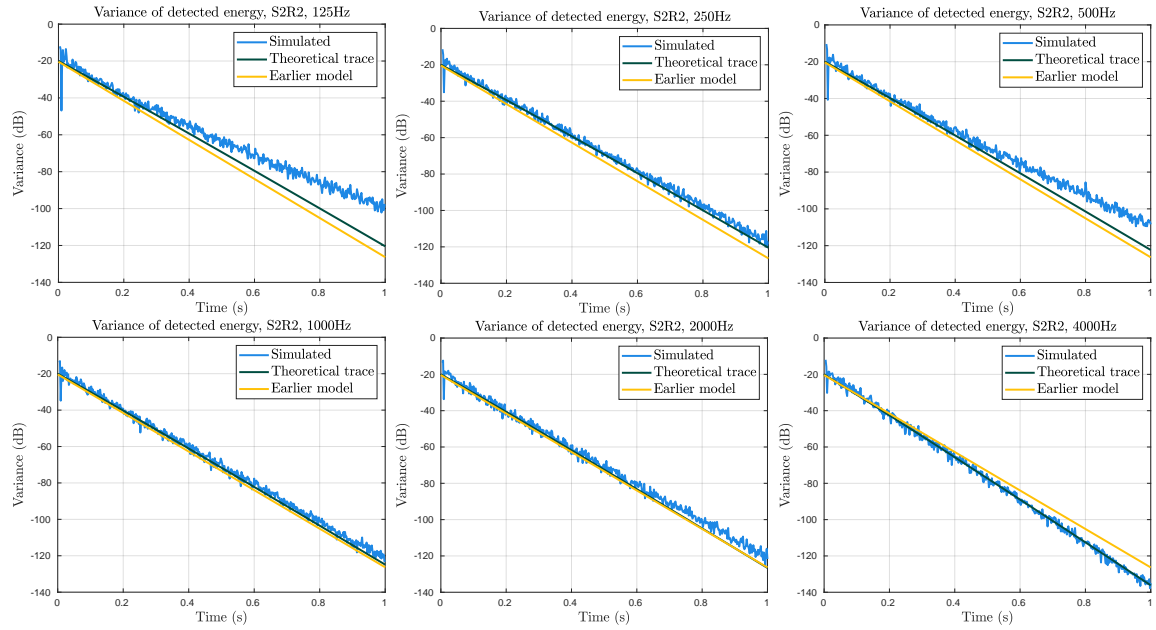

## S2R3

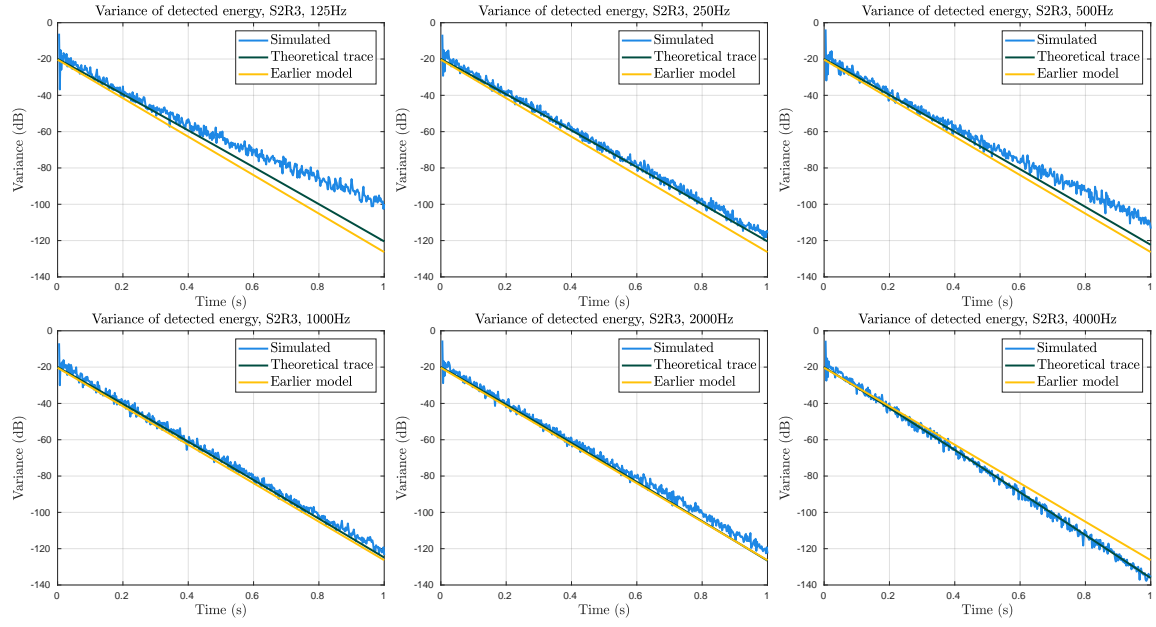

## S2R4

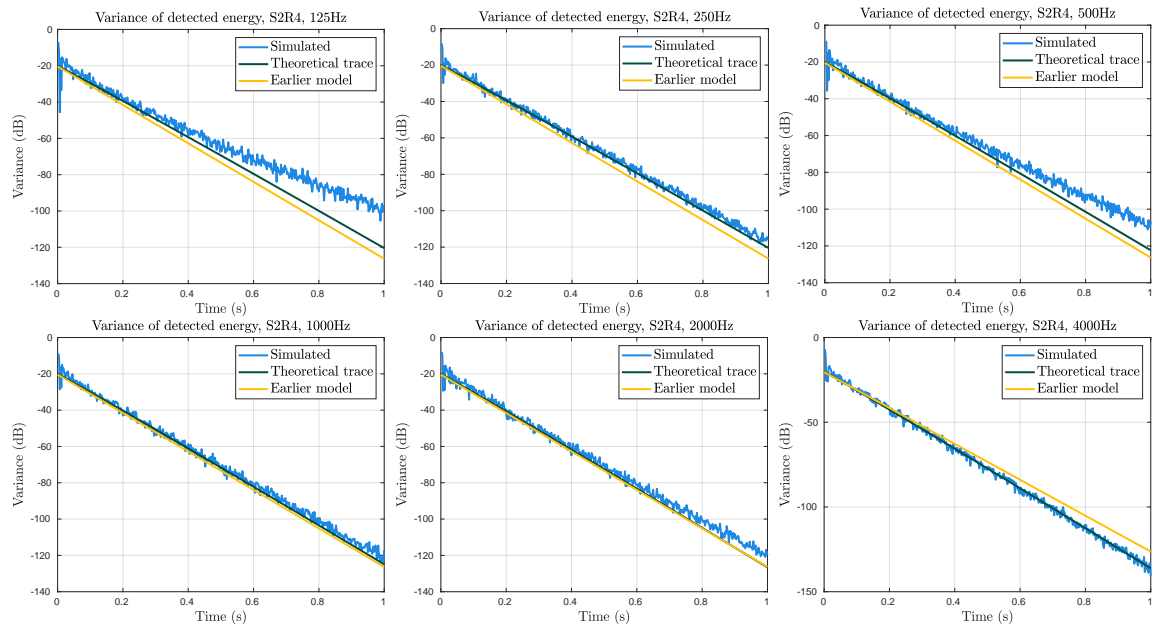



## 4 Predicted and simulated variance of detected energy to number of rays

### S1R1

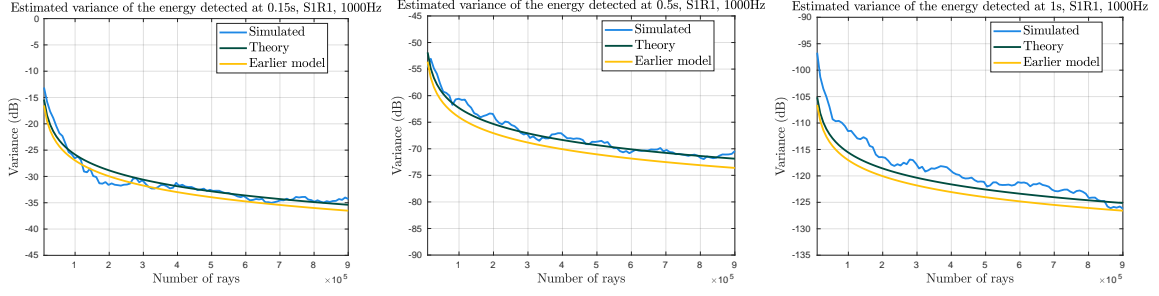

### S1R2

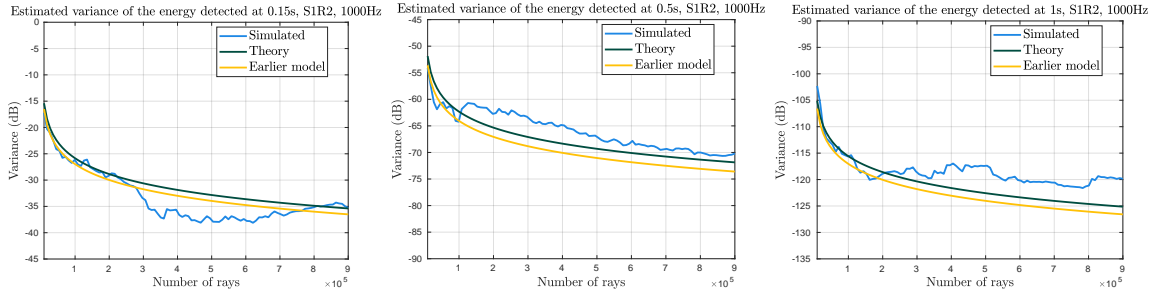

### S1R3

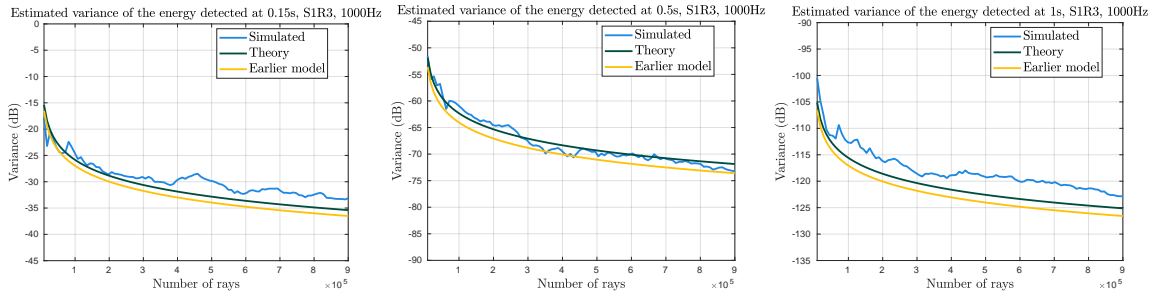

## S1R4

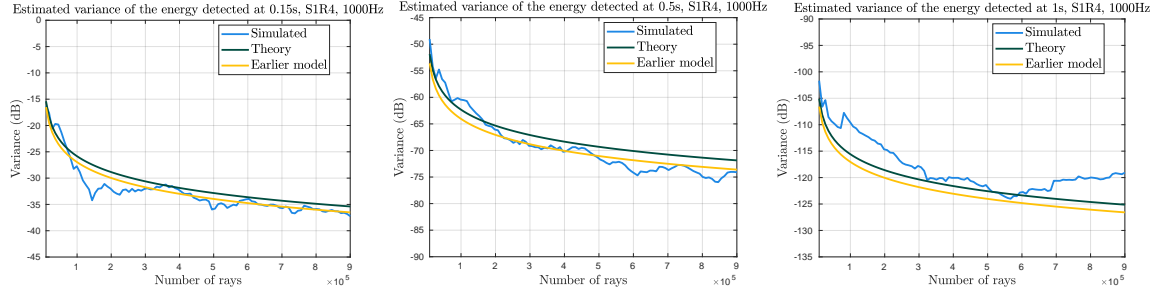

## S2R1

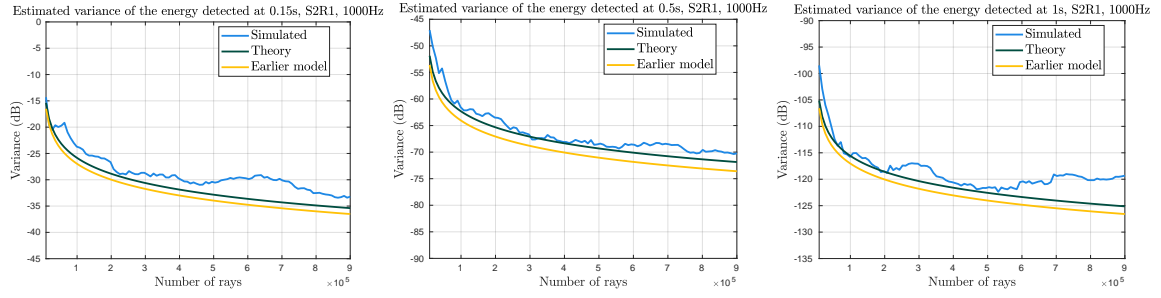

## S2R2

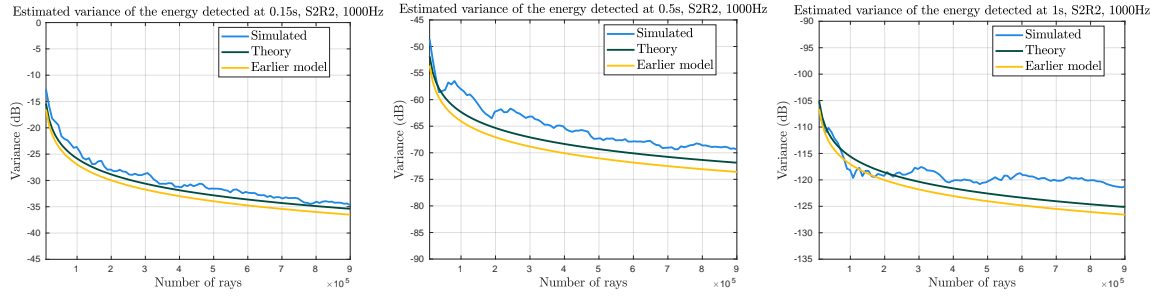

## S2R3

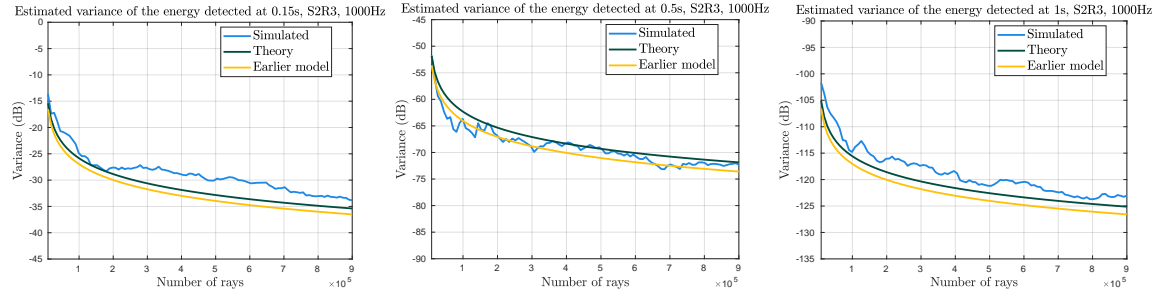

## S2R4

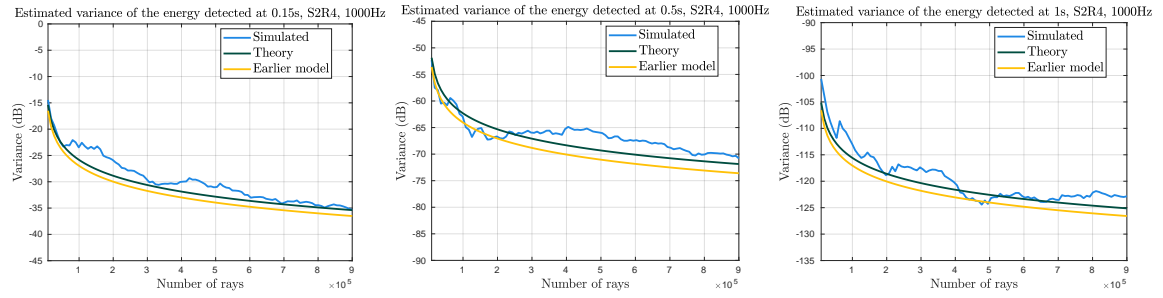

## 5 Mean detected energy, iterative and classical algorithm

S1R1, 0.25 s

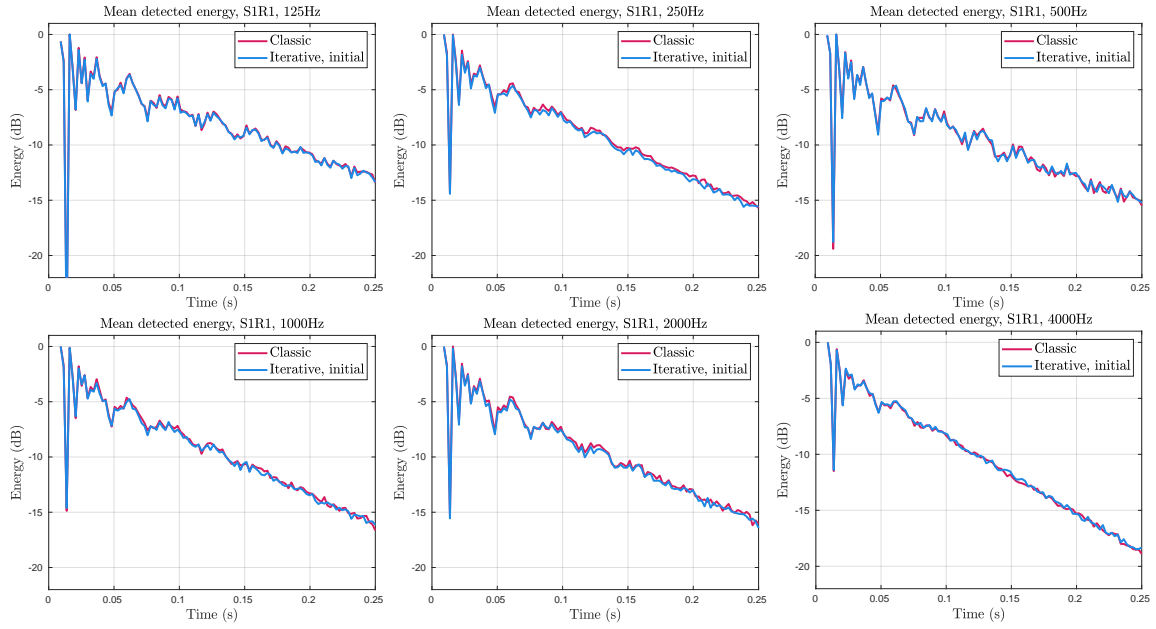

S1R1, 1 s

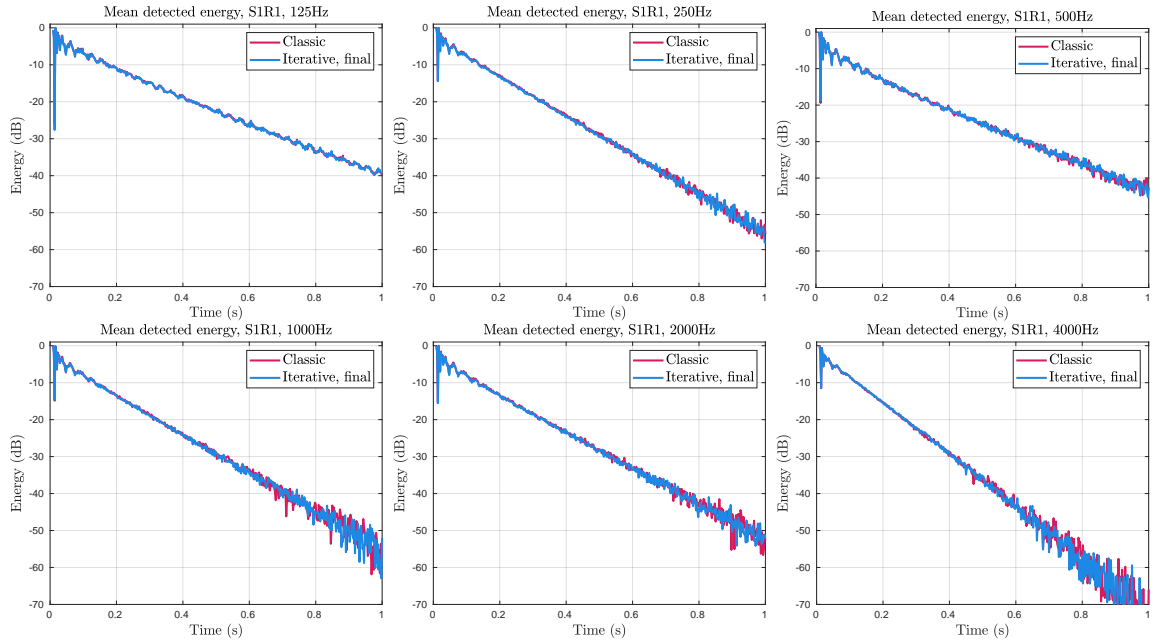

## S1R2, 0.25 s

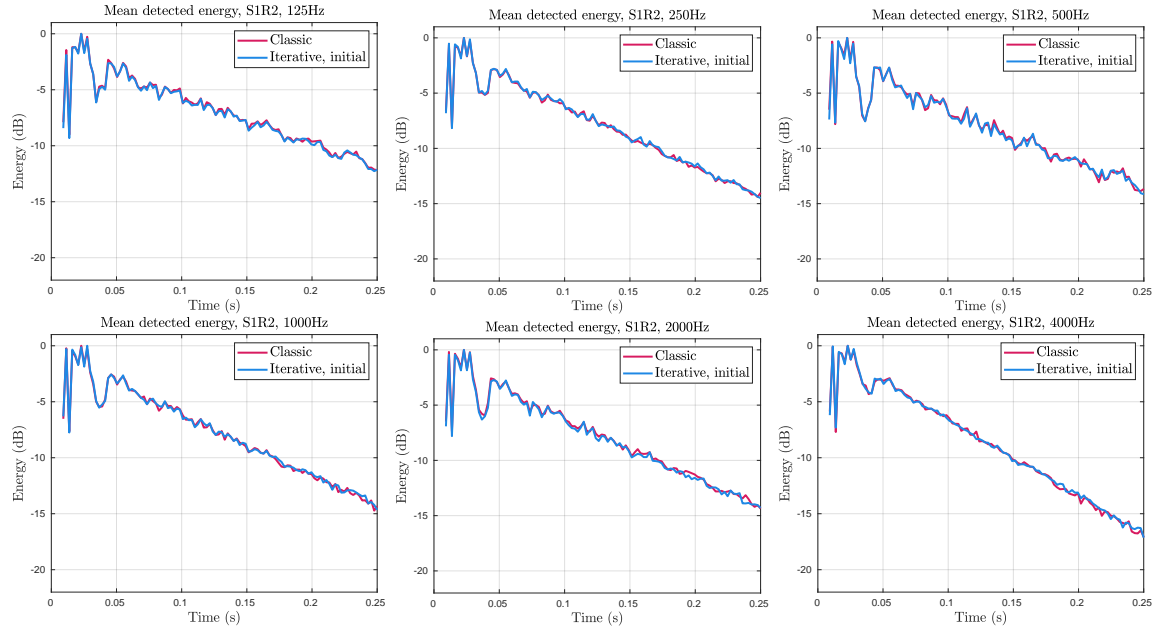

## S1R2, 1 s

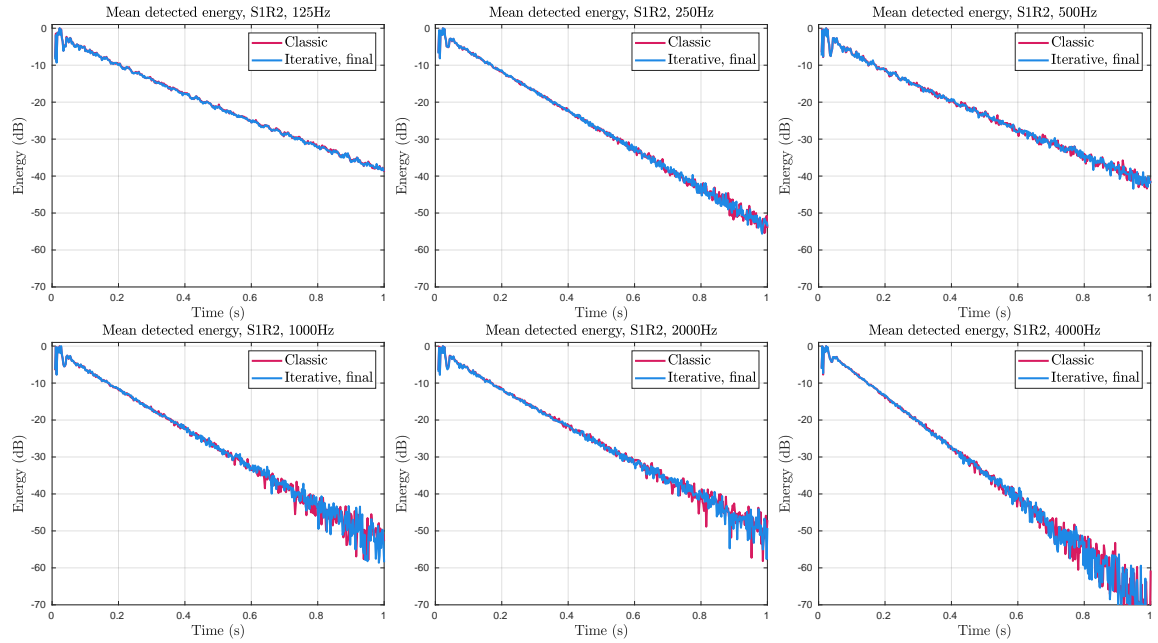

## S1R3, 0.25 s

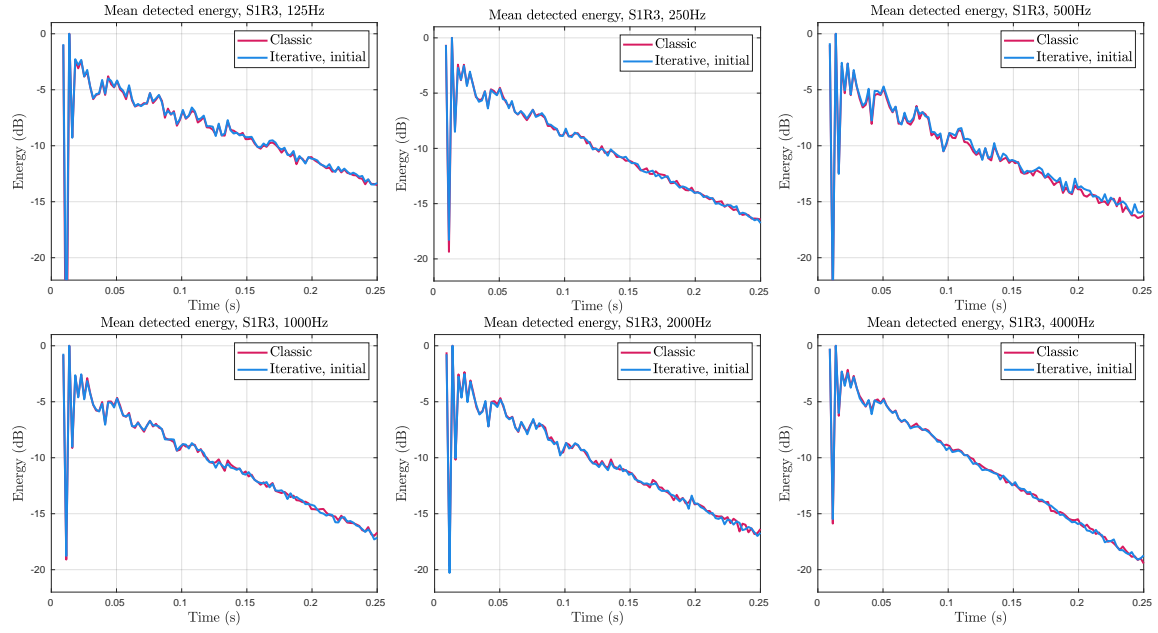

## S1R3, 1 s

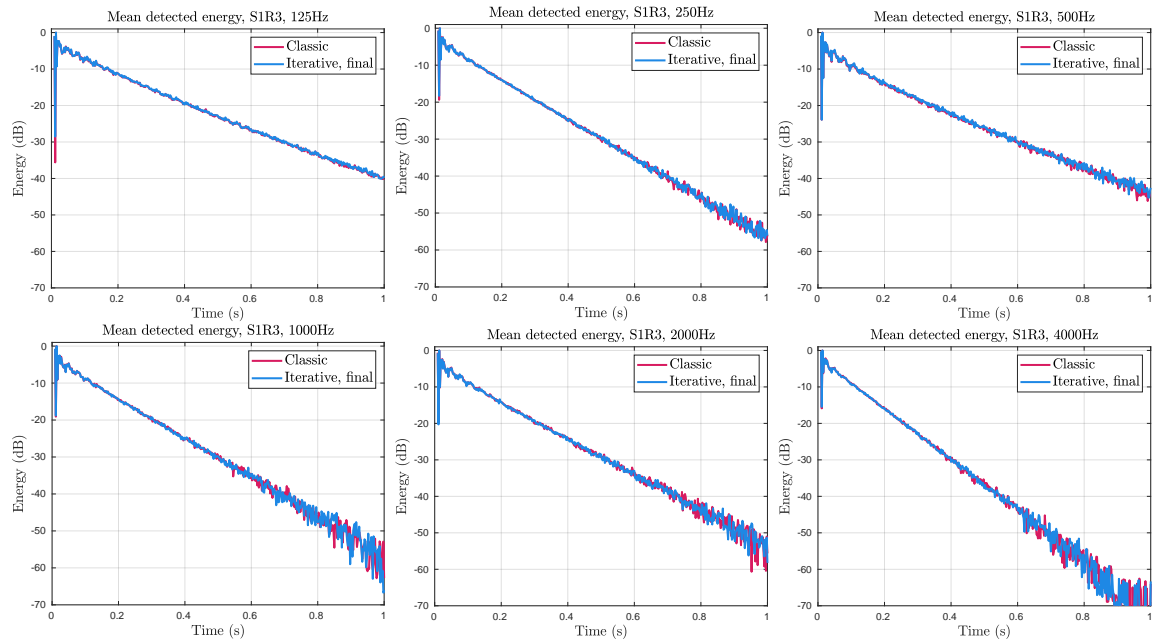

## S1R4, 0.25 s

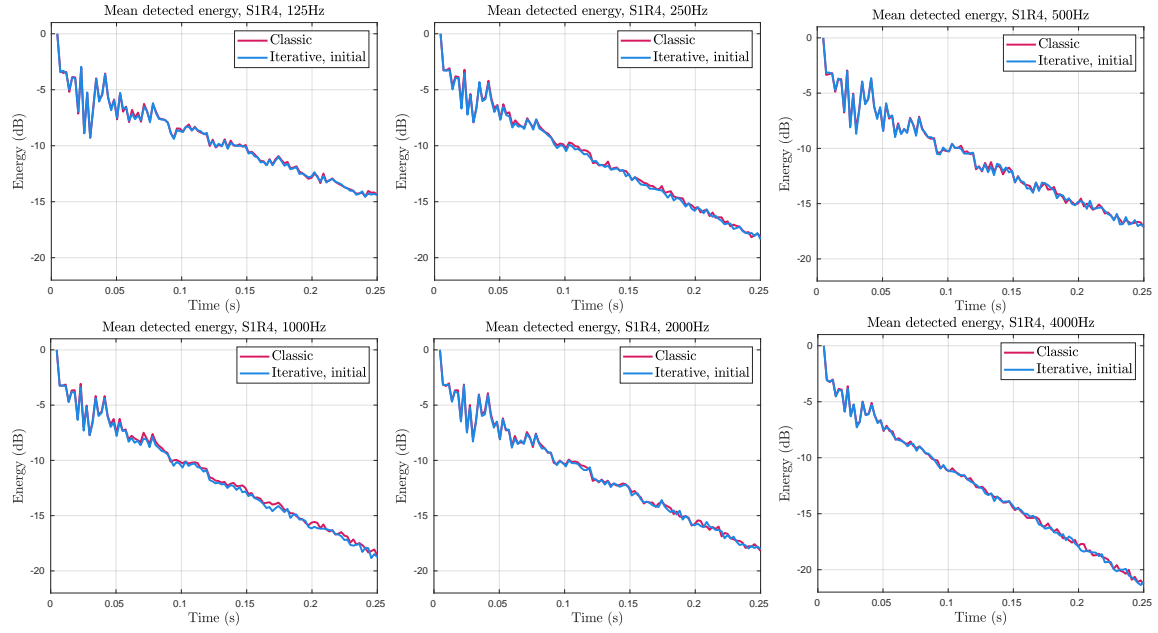

## S1R4, 1 s

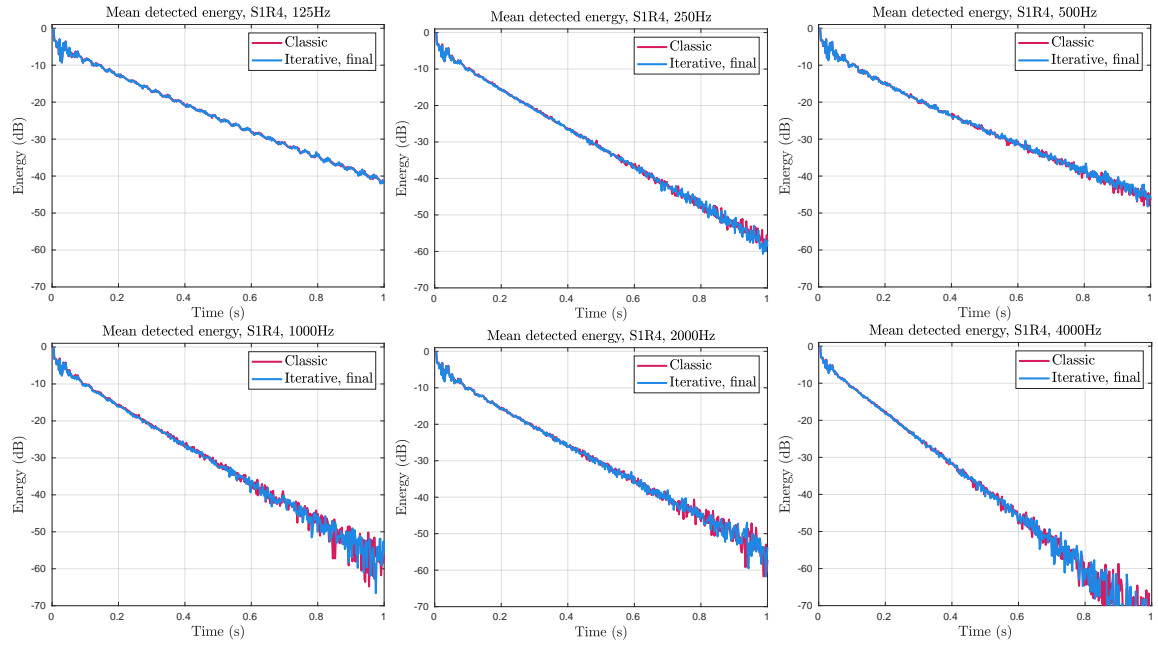

## S2R1, 0.25 s

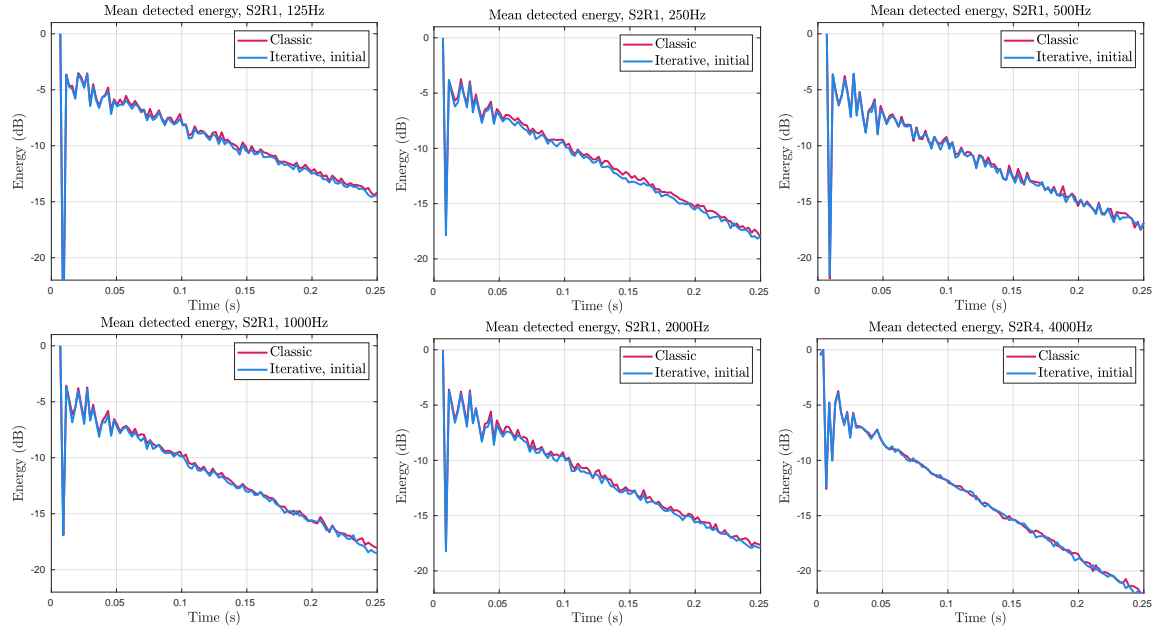

## S2R1, 1 s

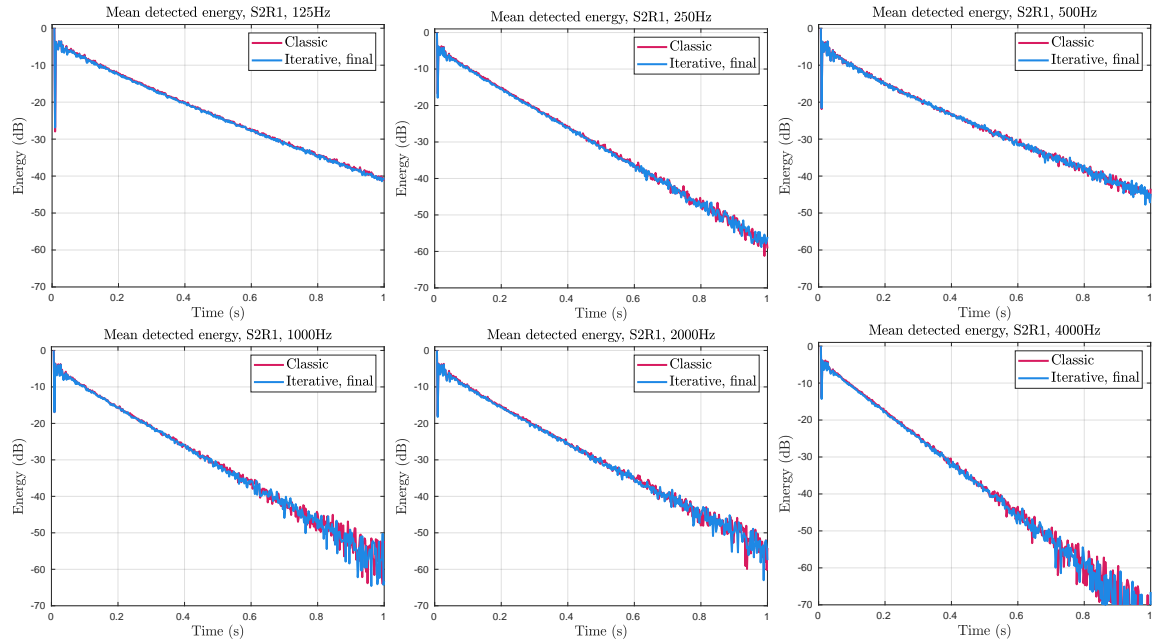



## S2R2, 0.25 s

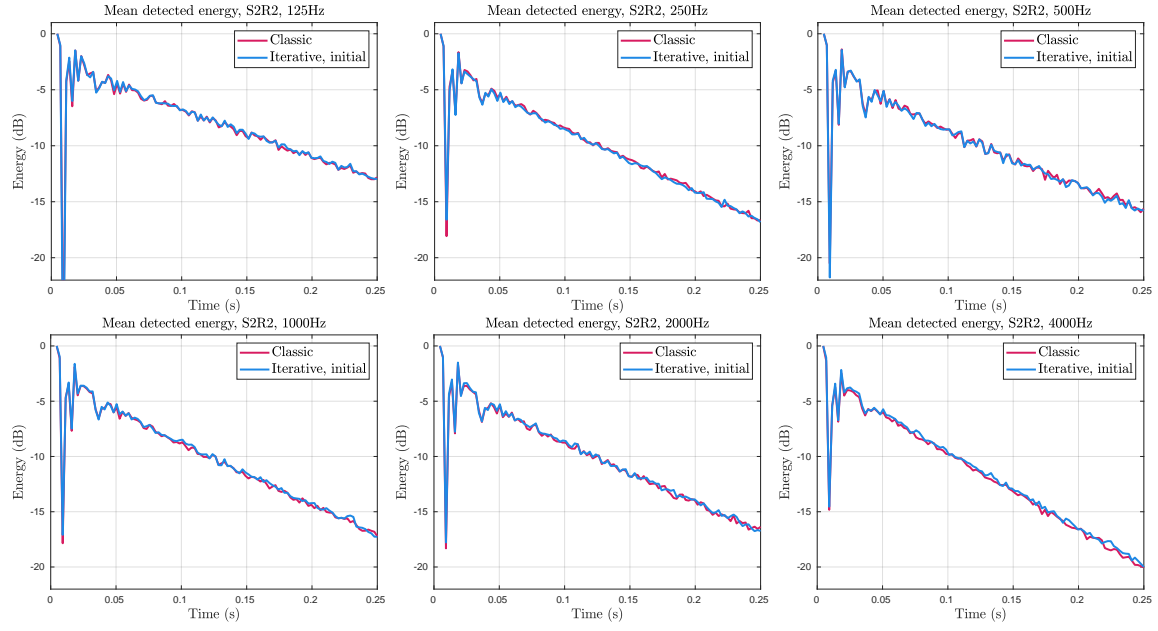

## S2R2, 1 s

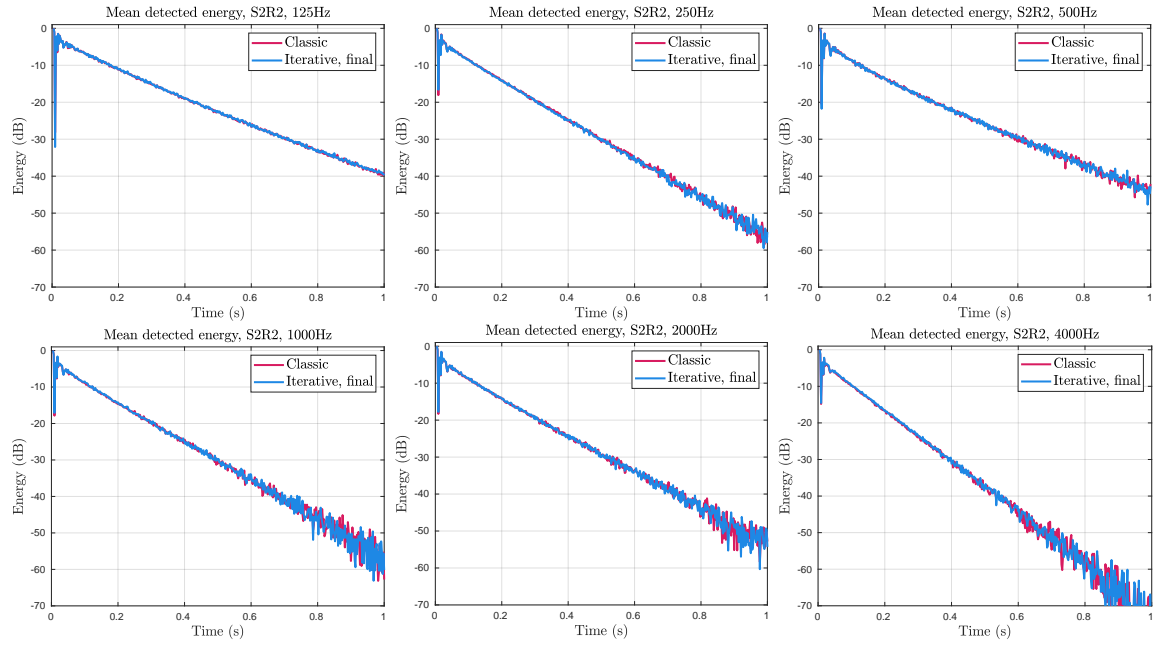

## S2R3, 0.25 s

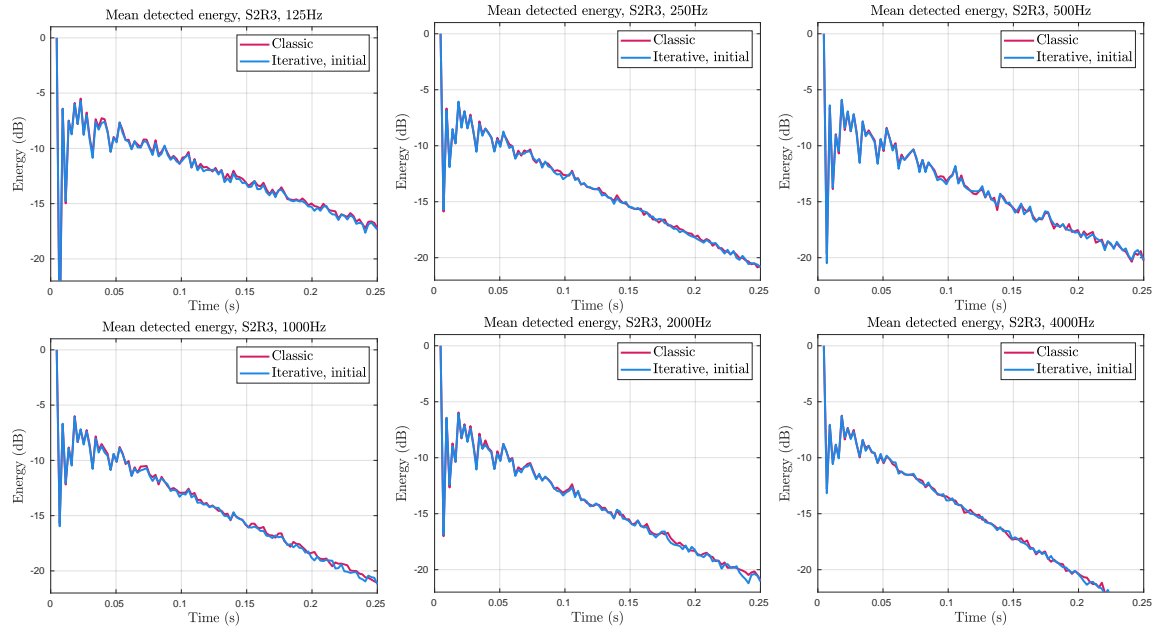

## S2R3, 1 s

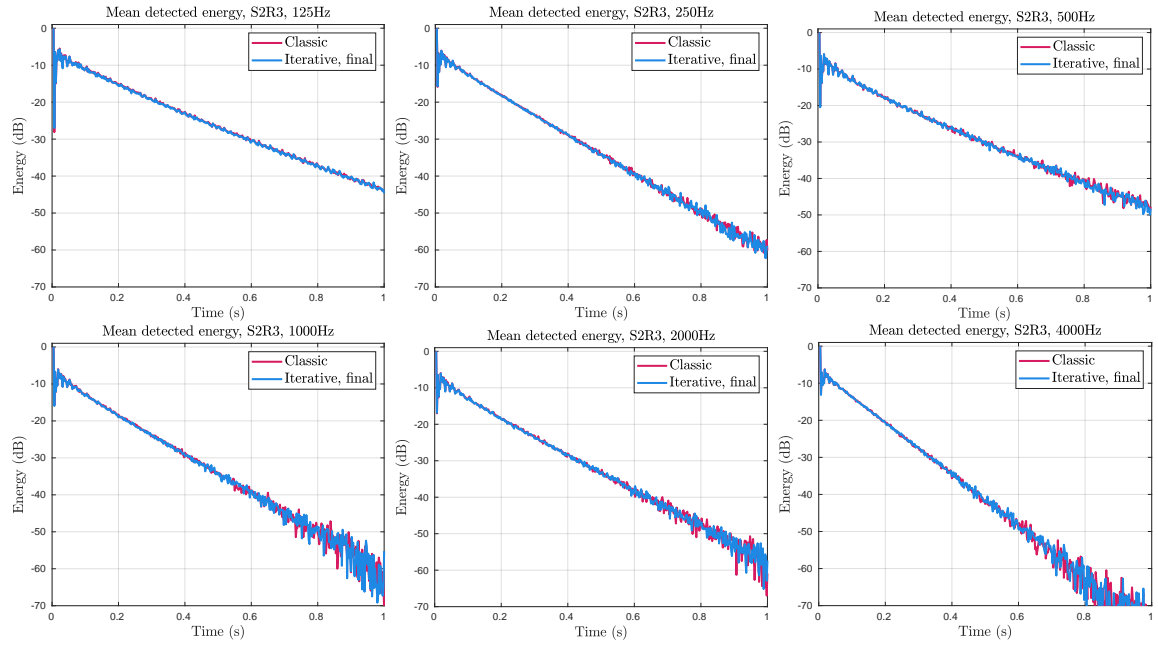

## S2R4, 0.25 s

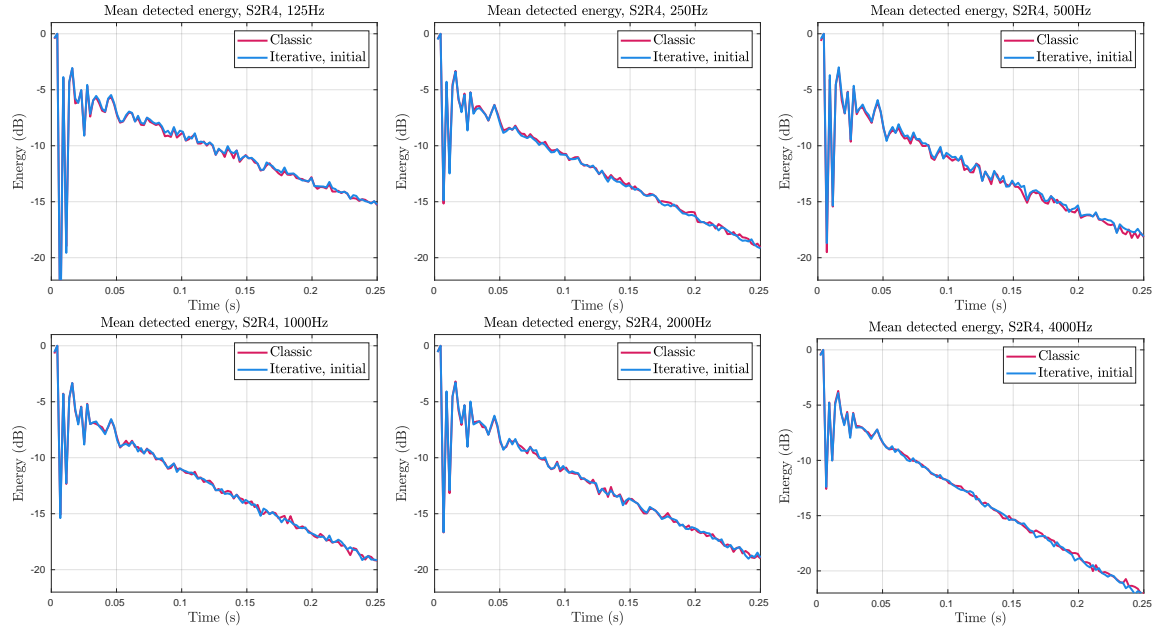

## S2R4, 1 s

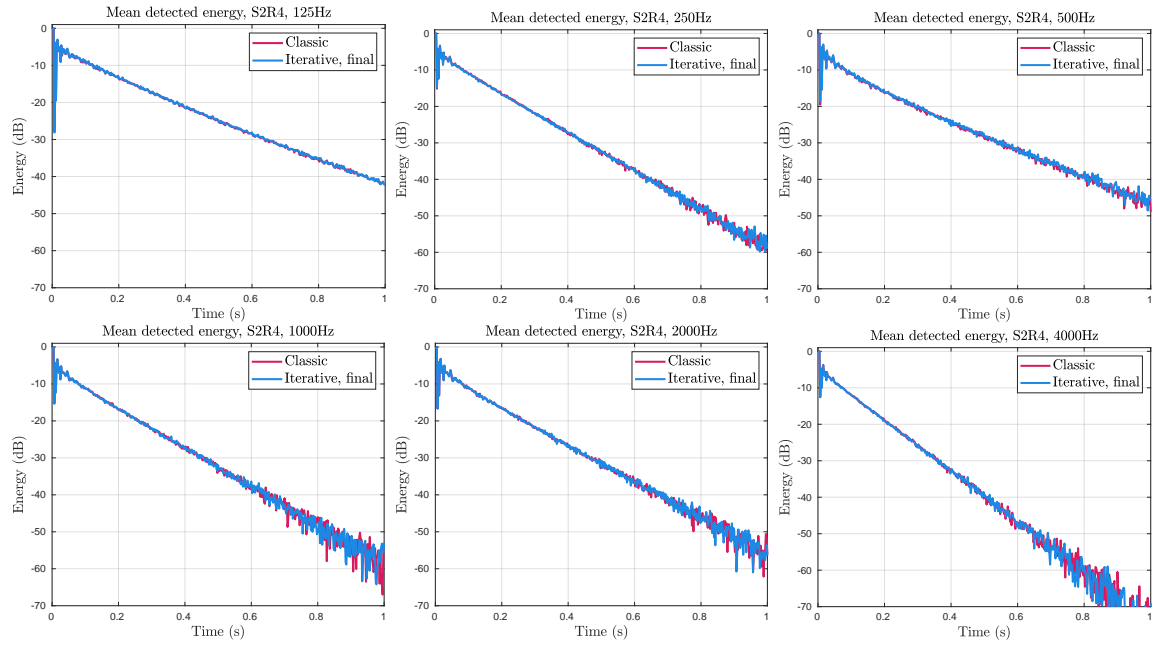

## 6 Variance of detected energy, iterative and classical algorithm

S1R1, 0.25 s

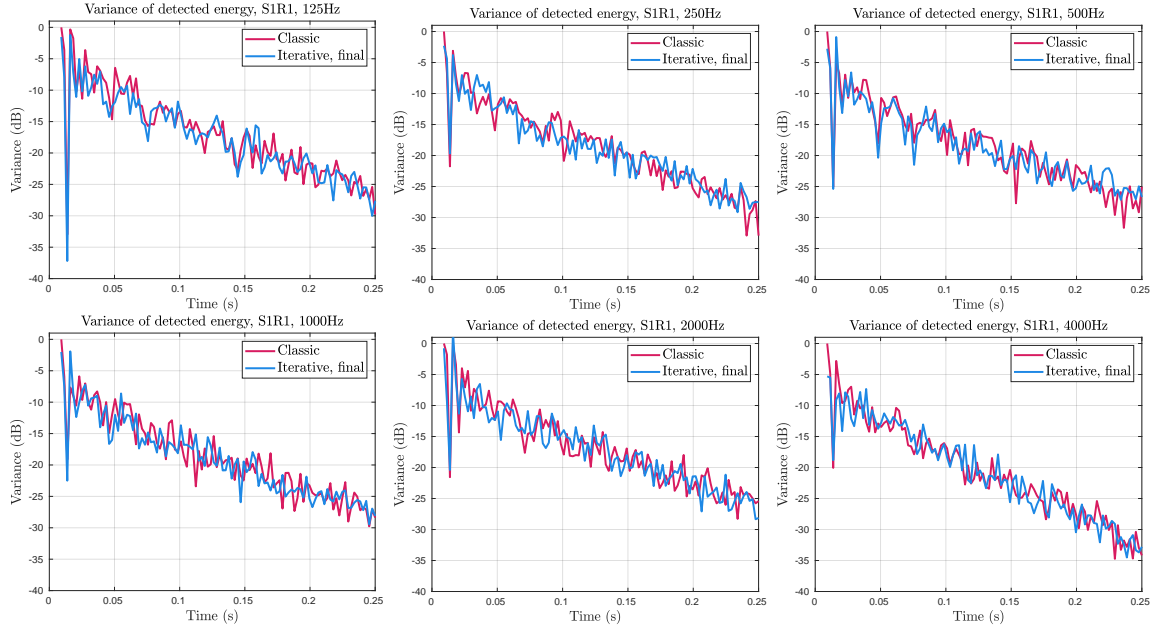

S1R1, 1 s

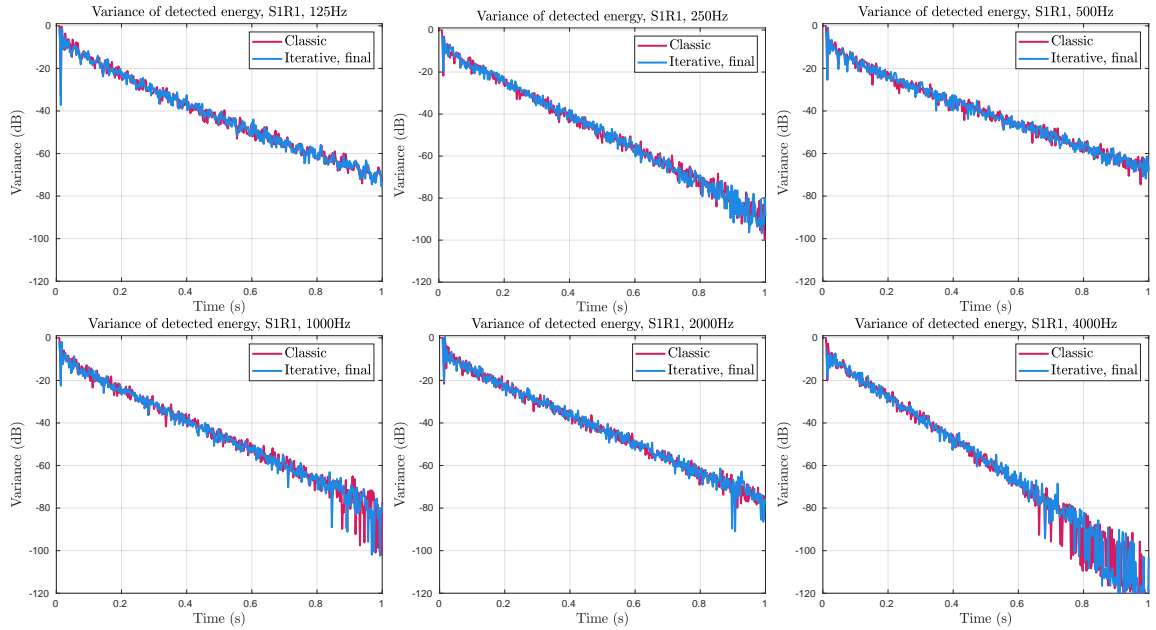

## S1R2, 0.25 s

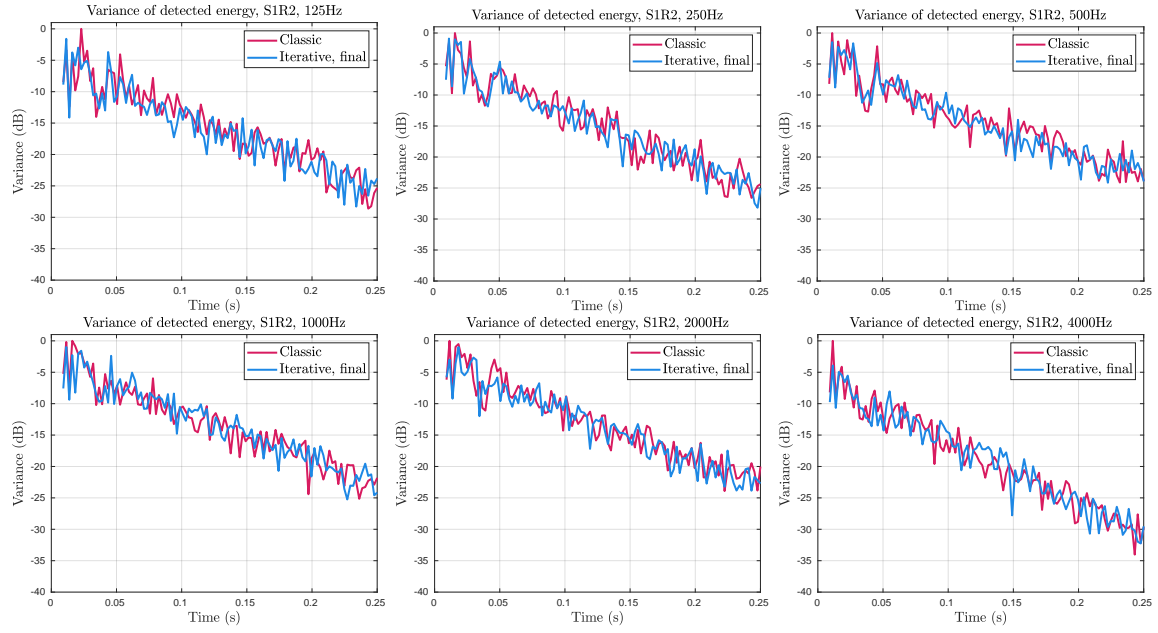

## S1R2, 1 s

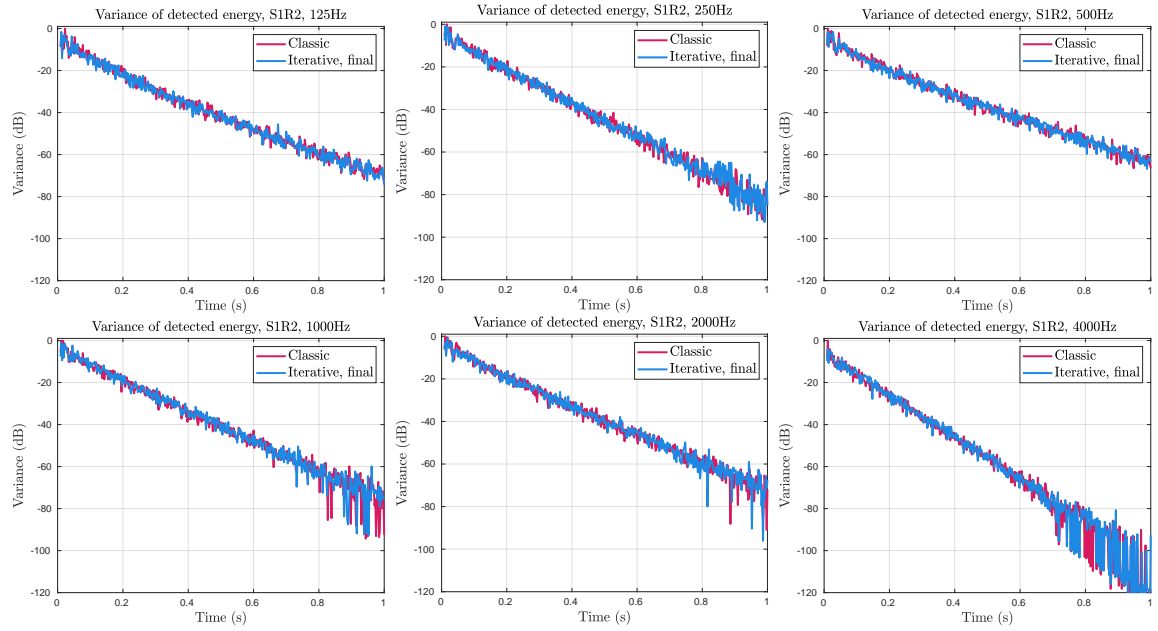

## S1R3, 0.25 s

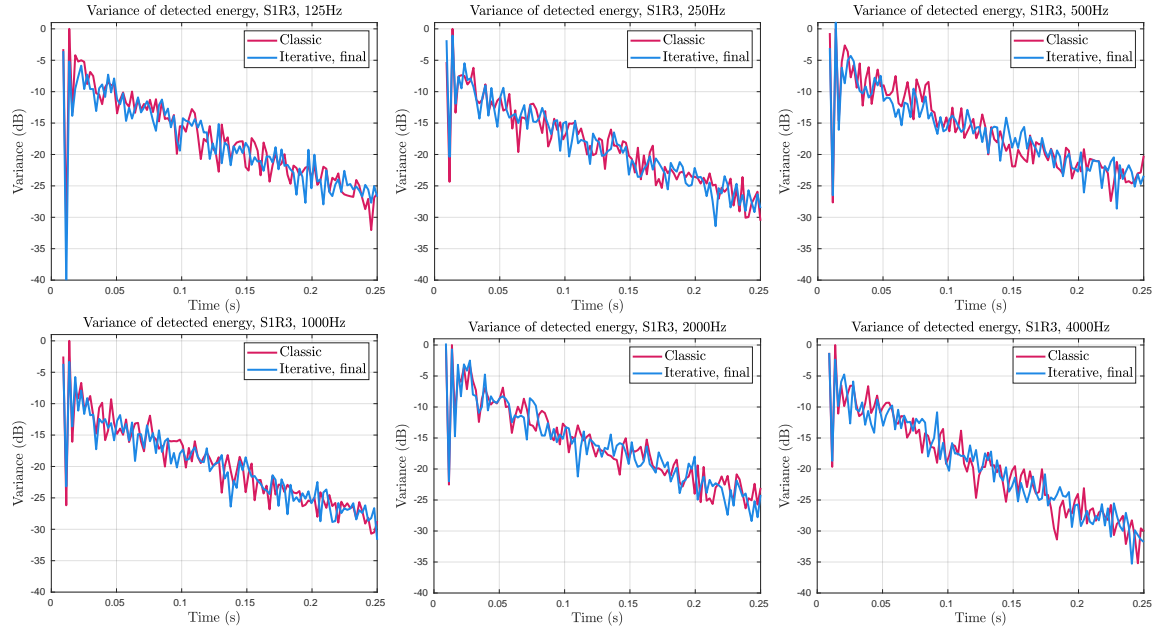

## S1R3, 1 s

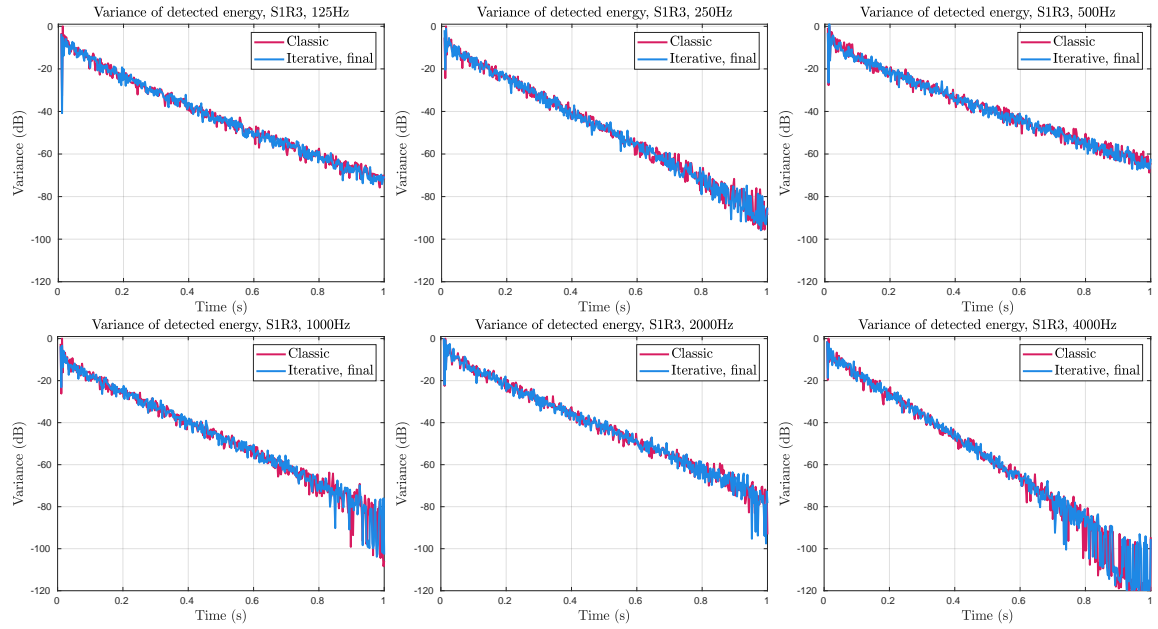

## S1R4, 0.25 s

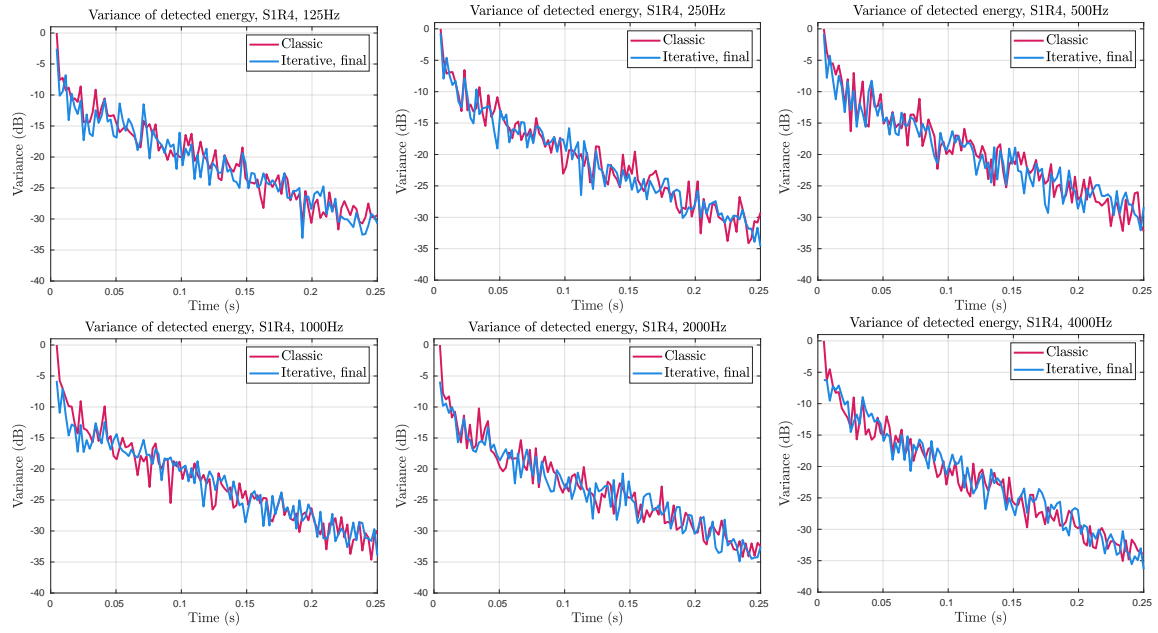

## S1R4, 1 s

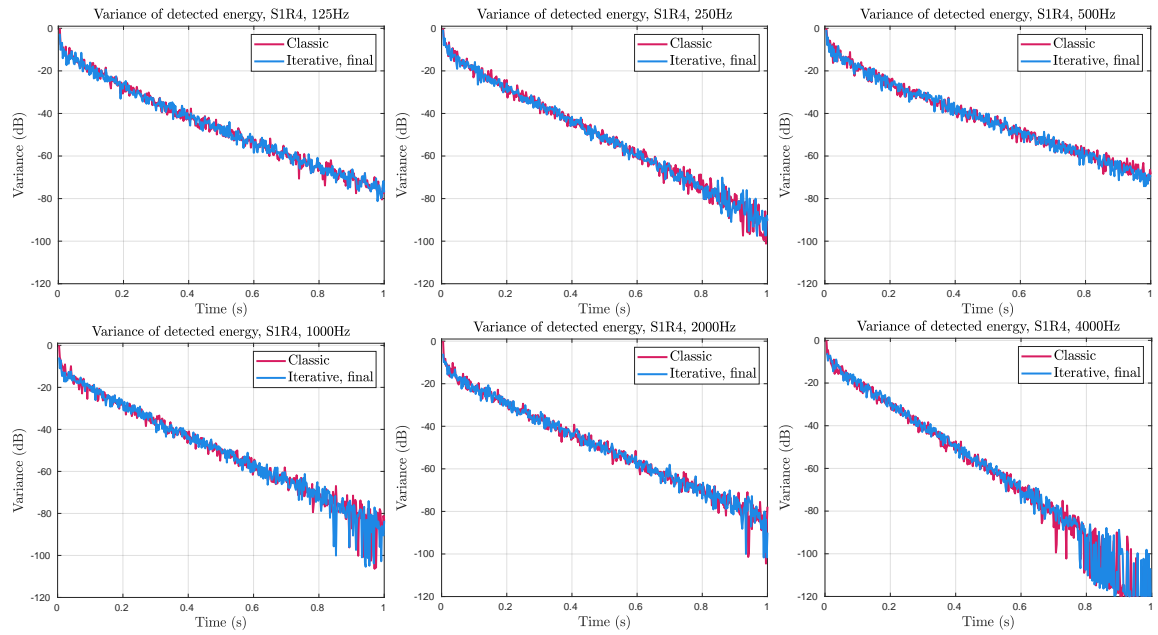

## S2R1, 0.25 s

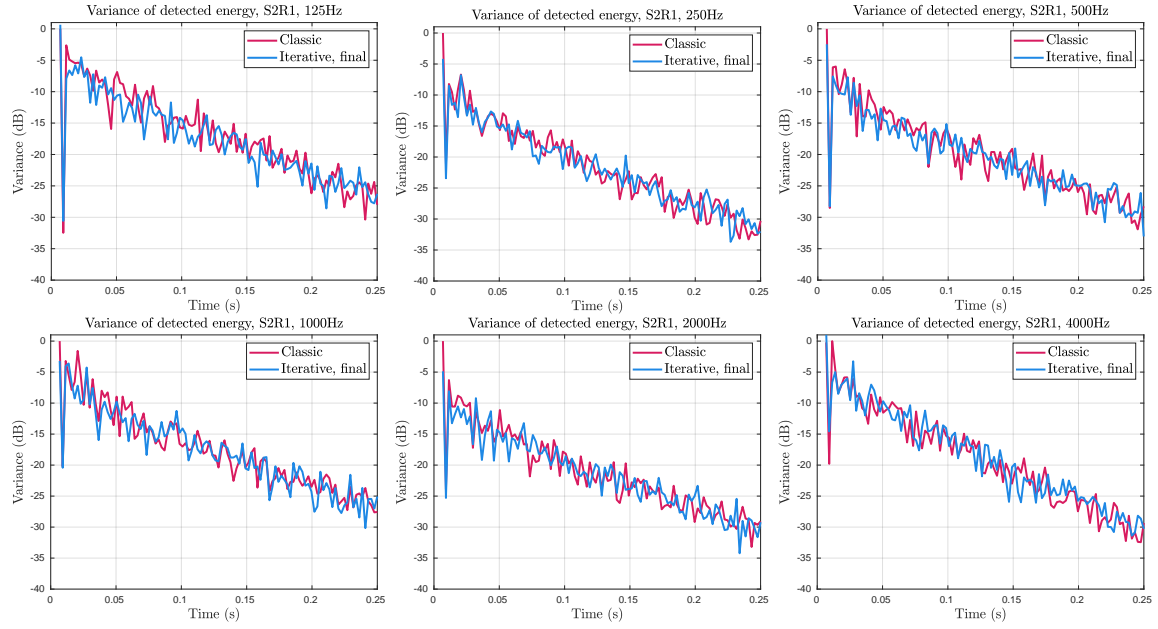

## S2R1, 1 s

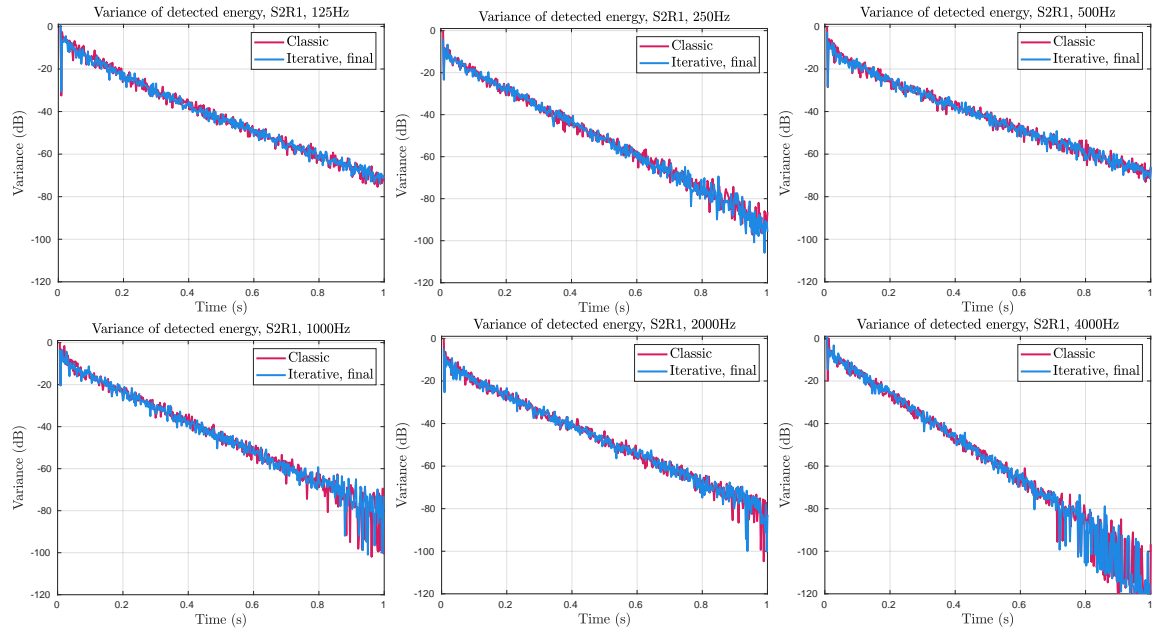



## S2R2, 0.25 s

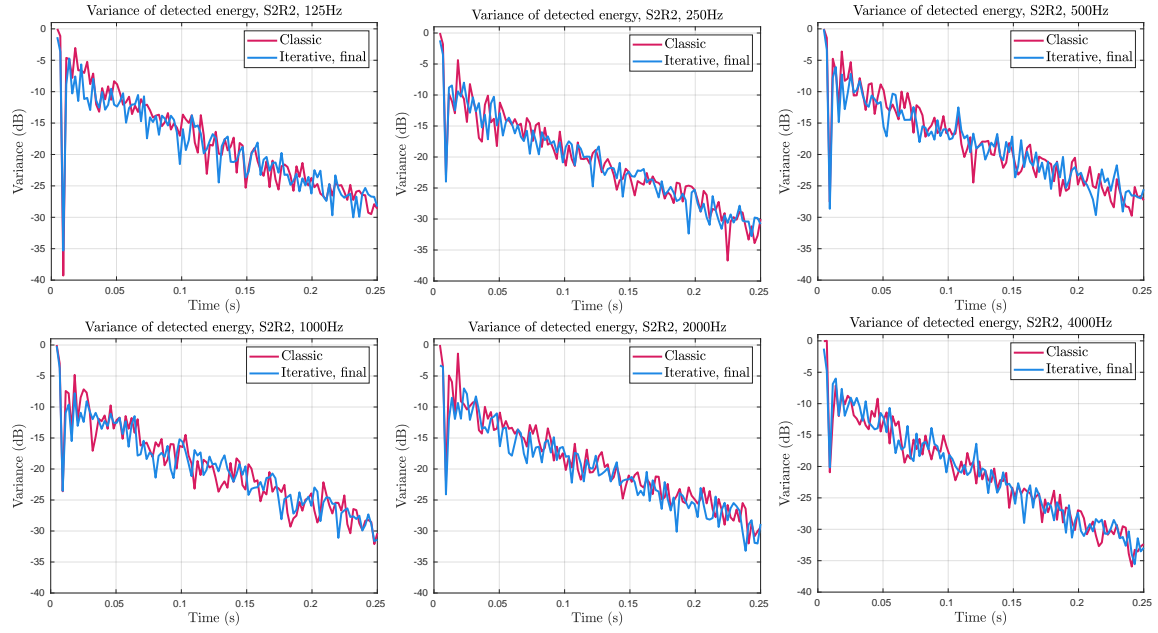

## S2R2, 1 s

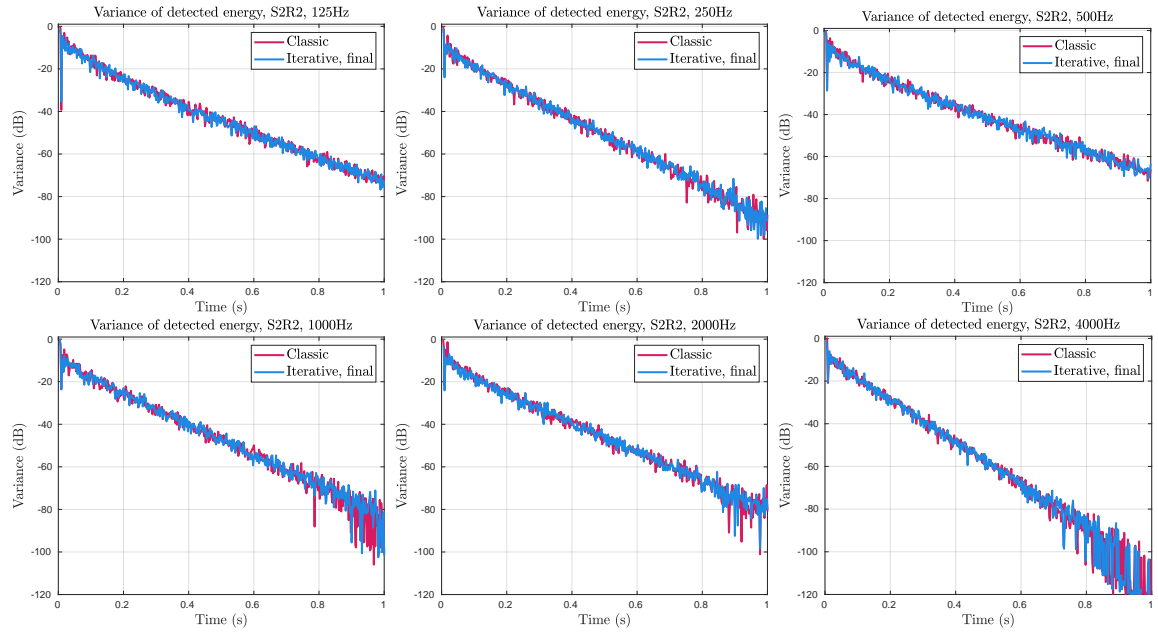

## S2R3, 0.25 s

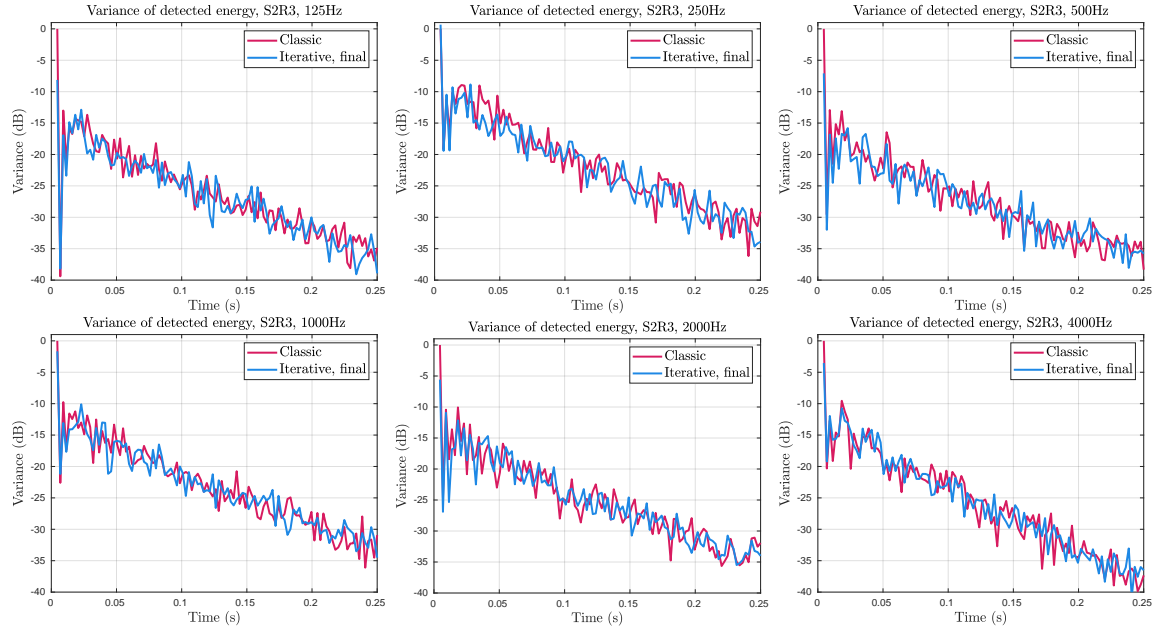

## S2R3, 1 s

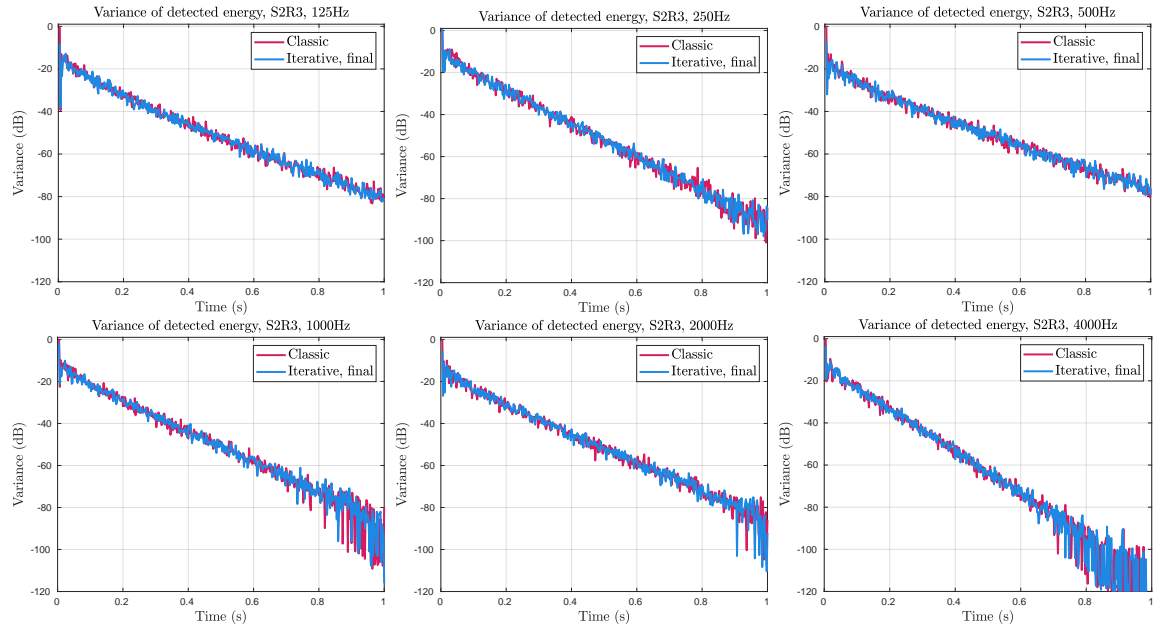

## S2R4, 0.25 s

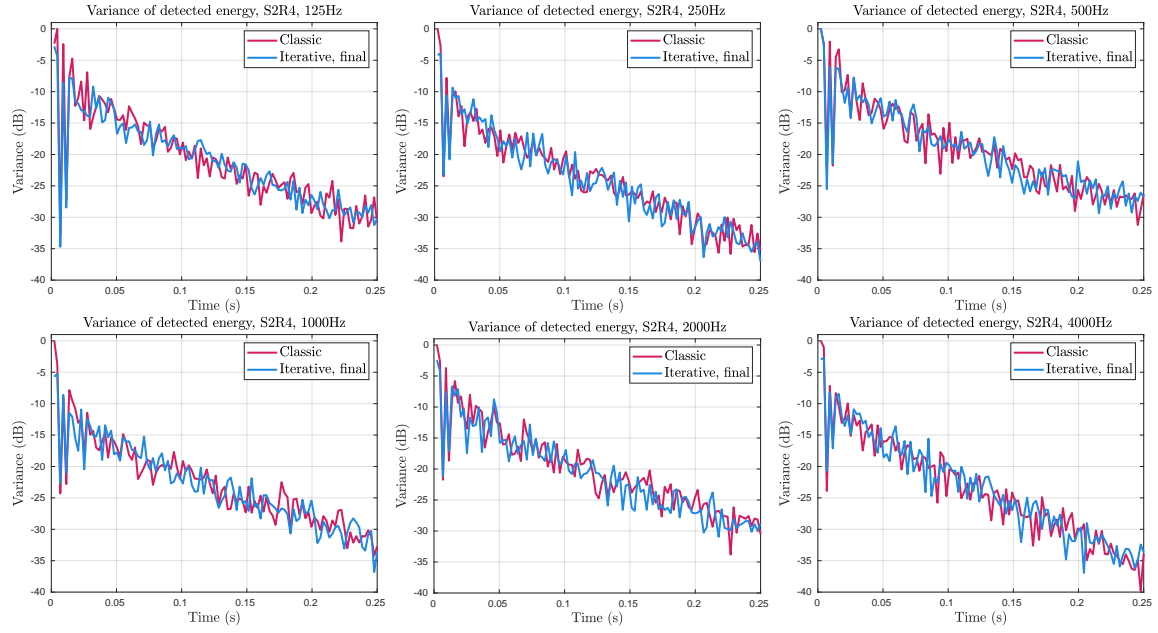

## S2R4, 1 s

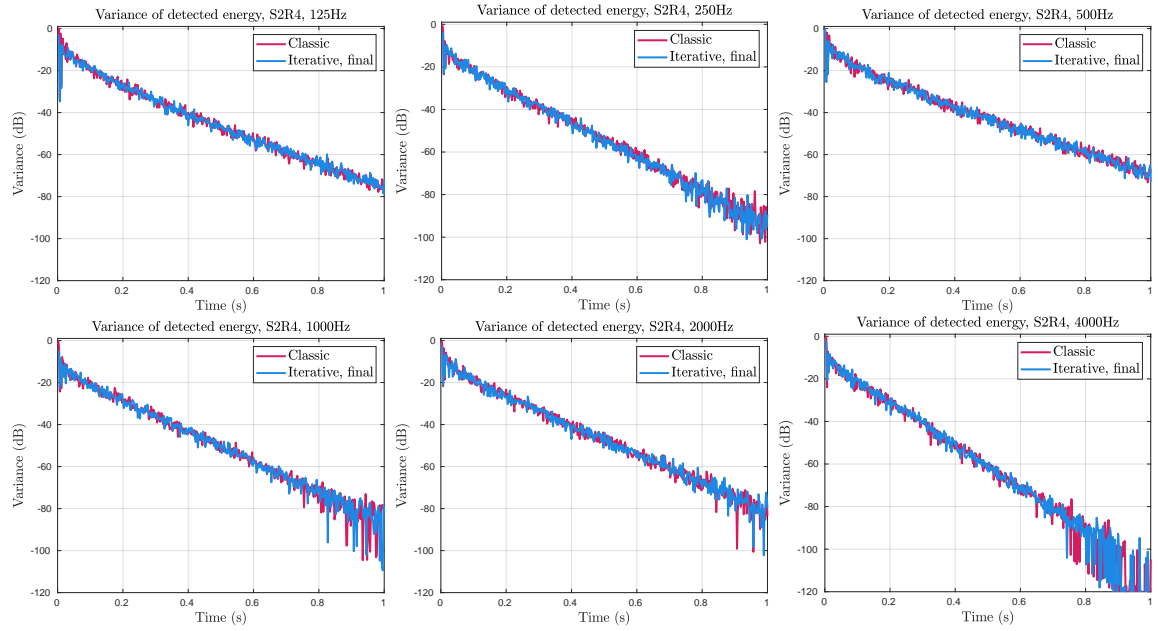

## 7 Reverberation time to number of rays

### Spatial average

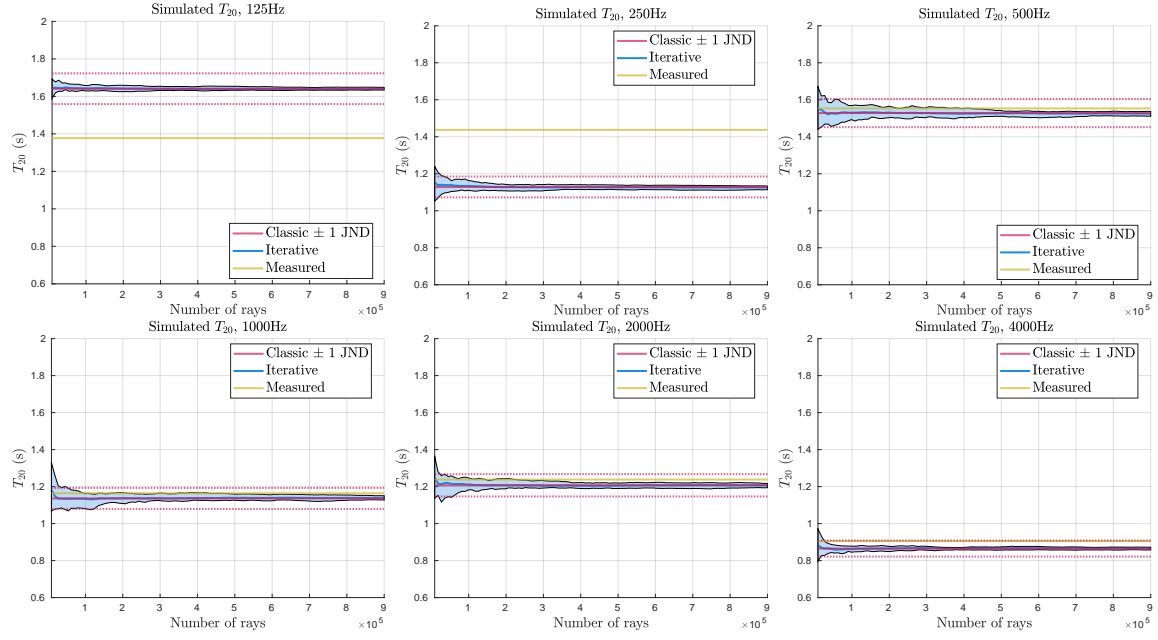

## 8 Early Decay Time

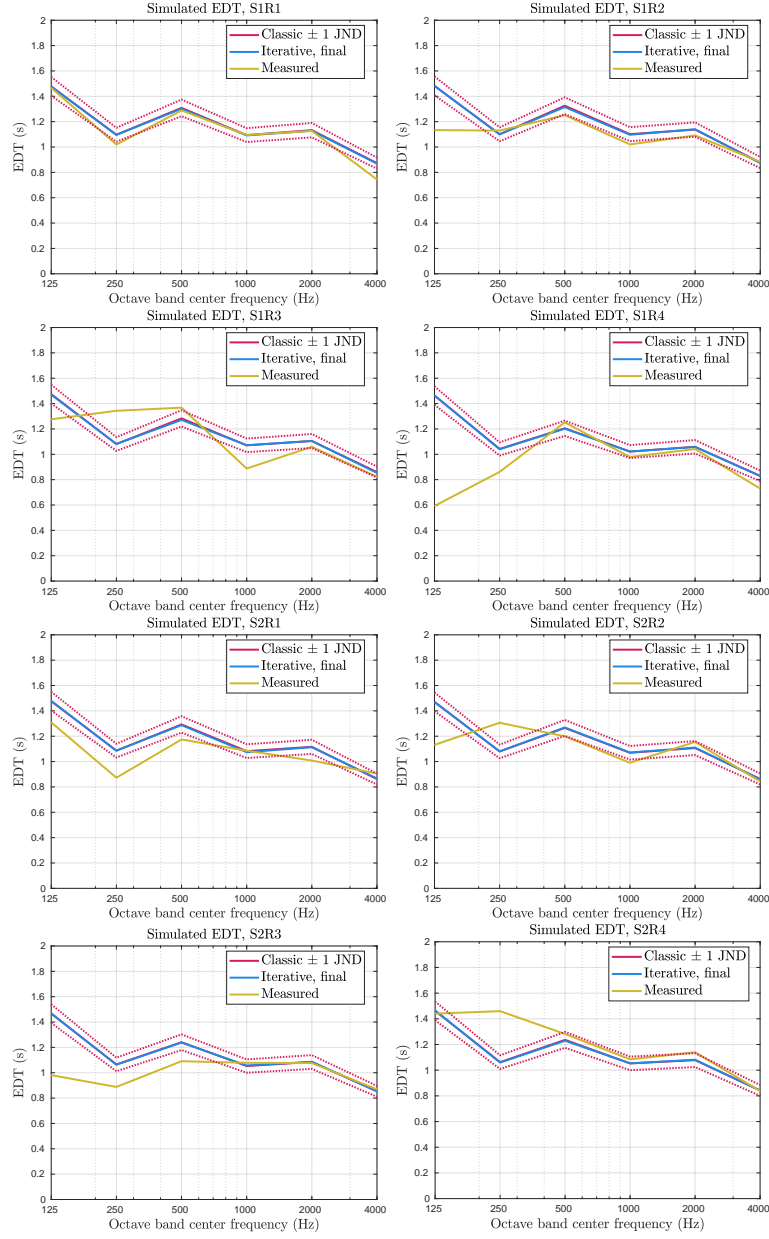

## 9 Early decay time to number of rays

### S1R1

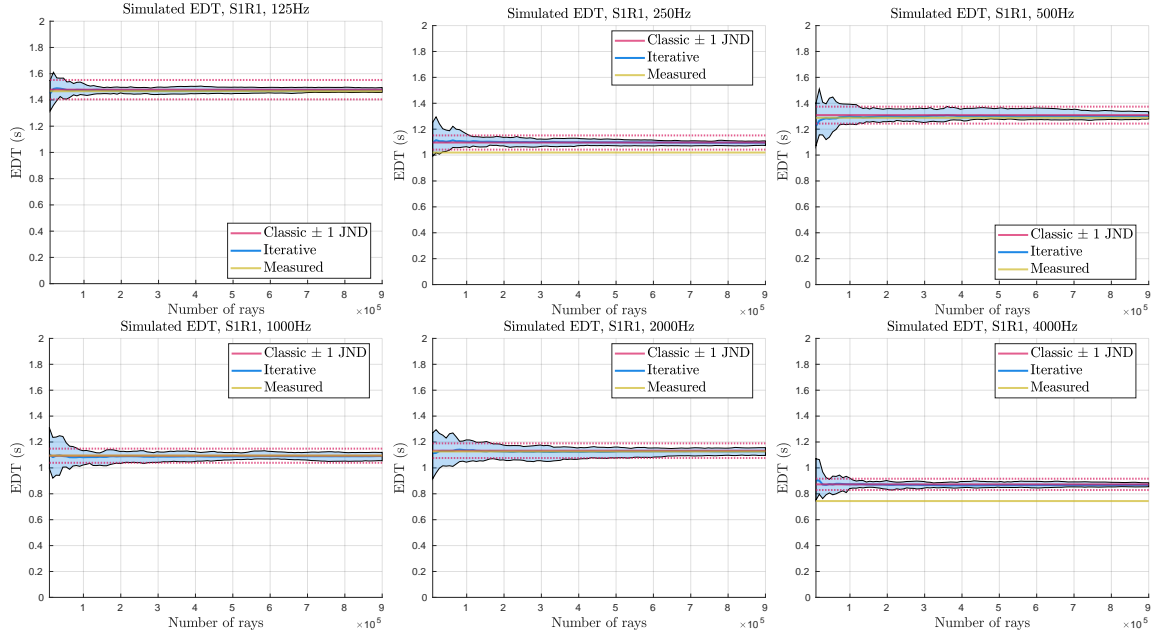

### S1R2

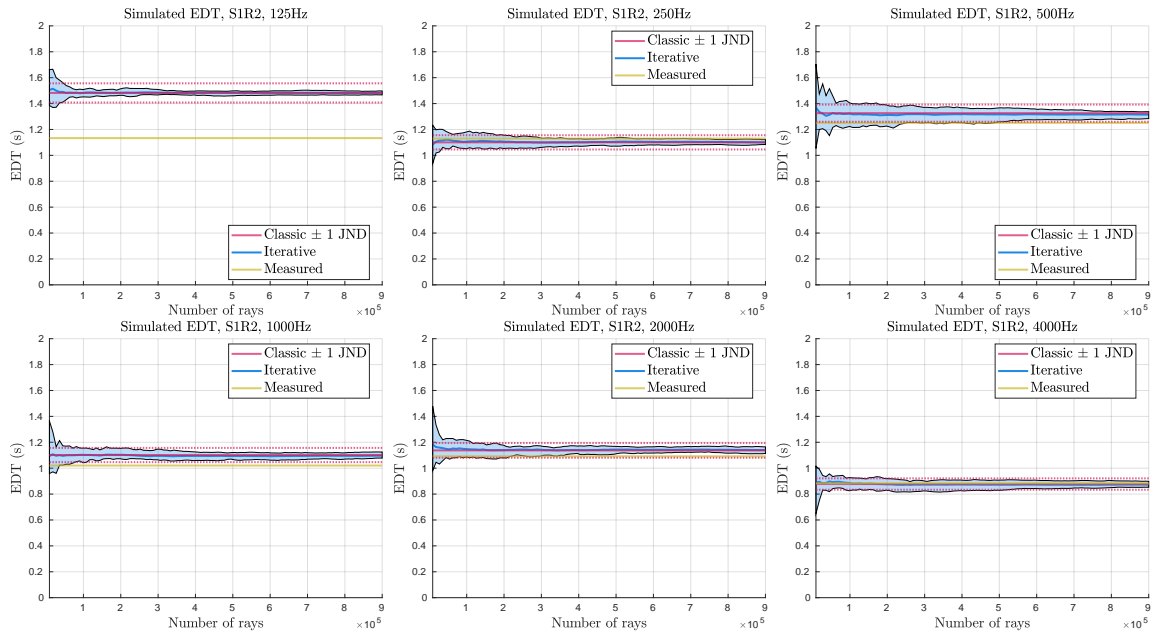

## S1R3

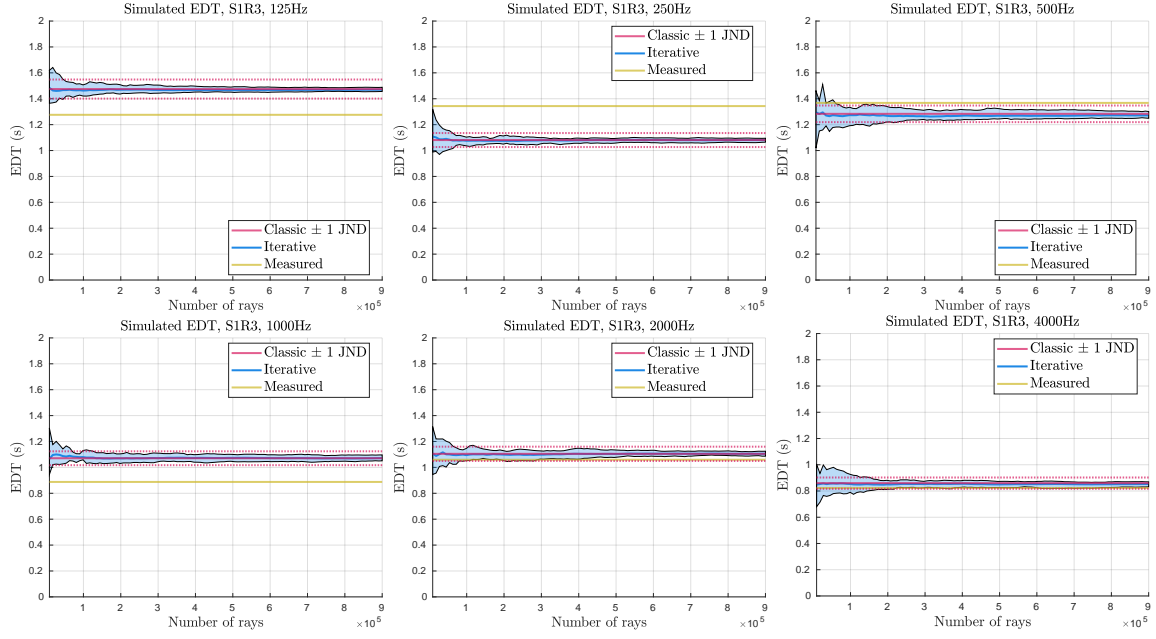

## S1R4

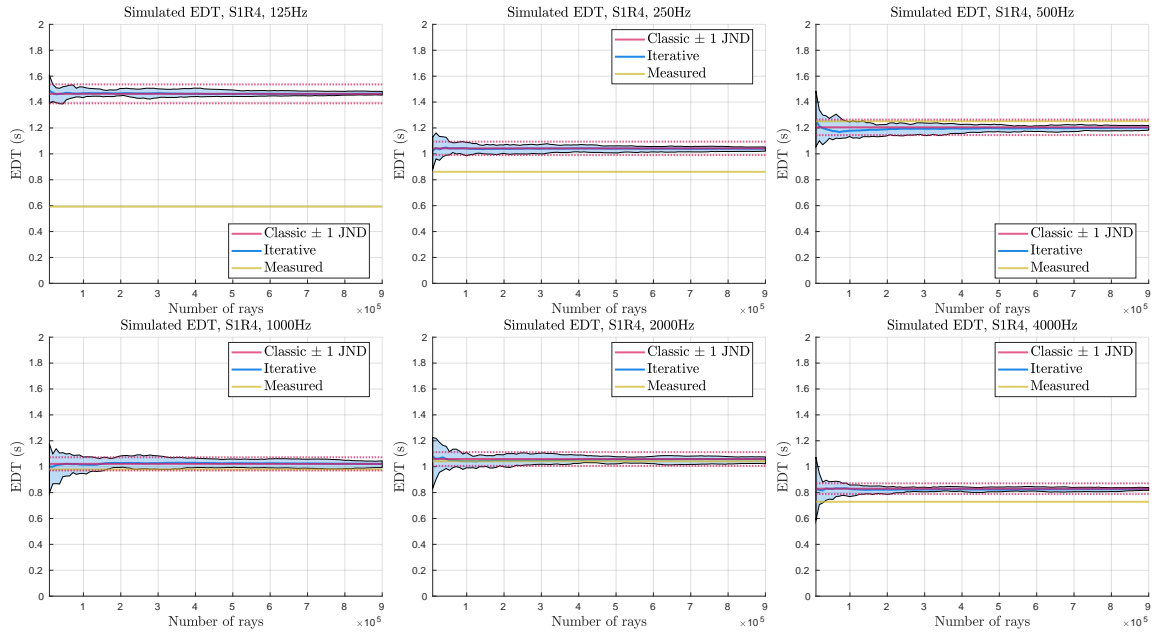

## S2R1

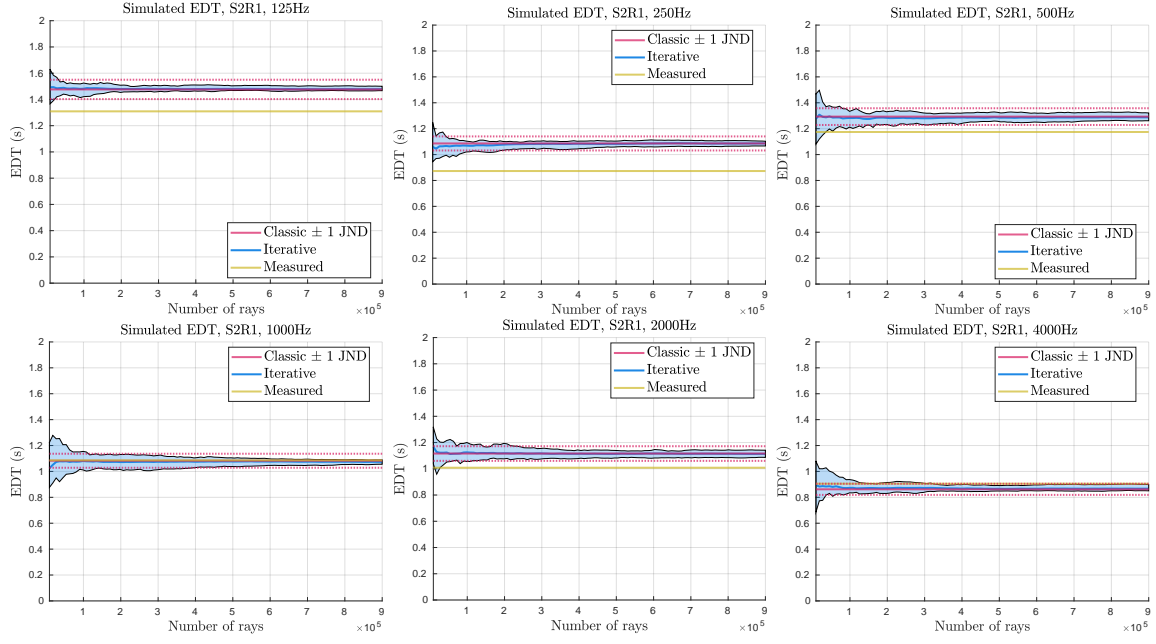

## S2R2

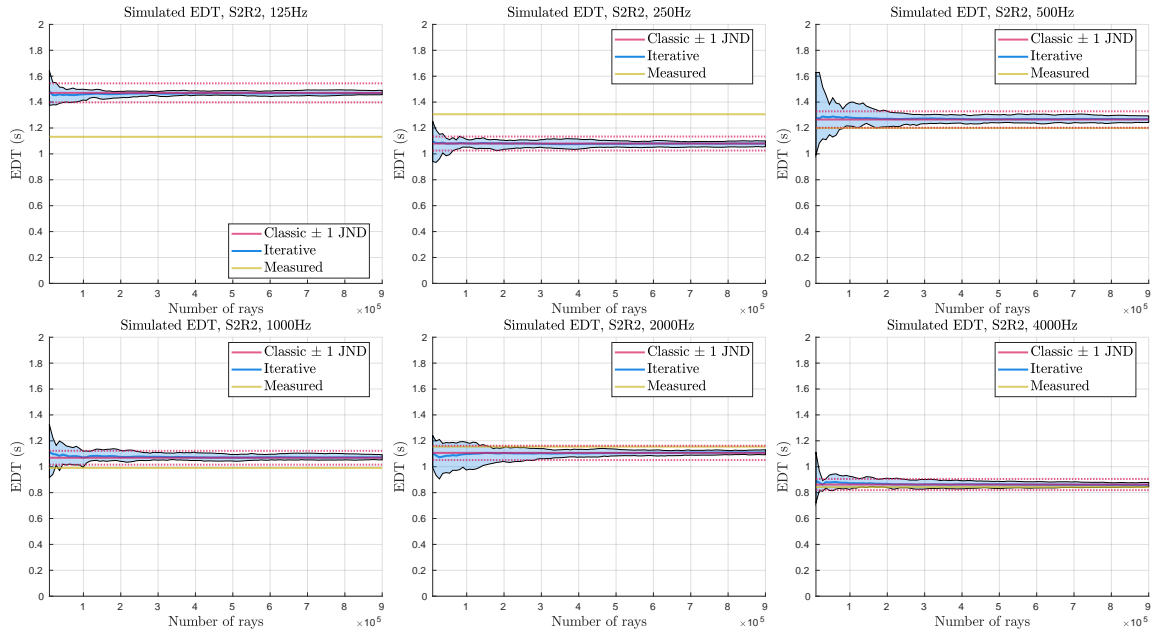



## S2R3

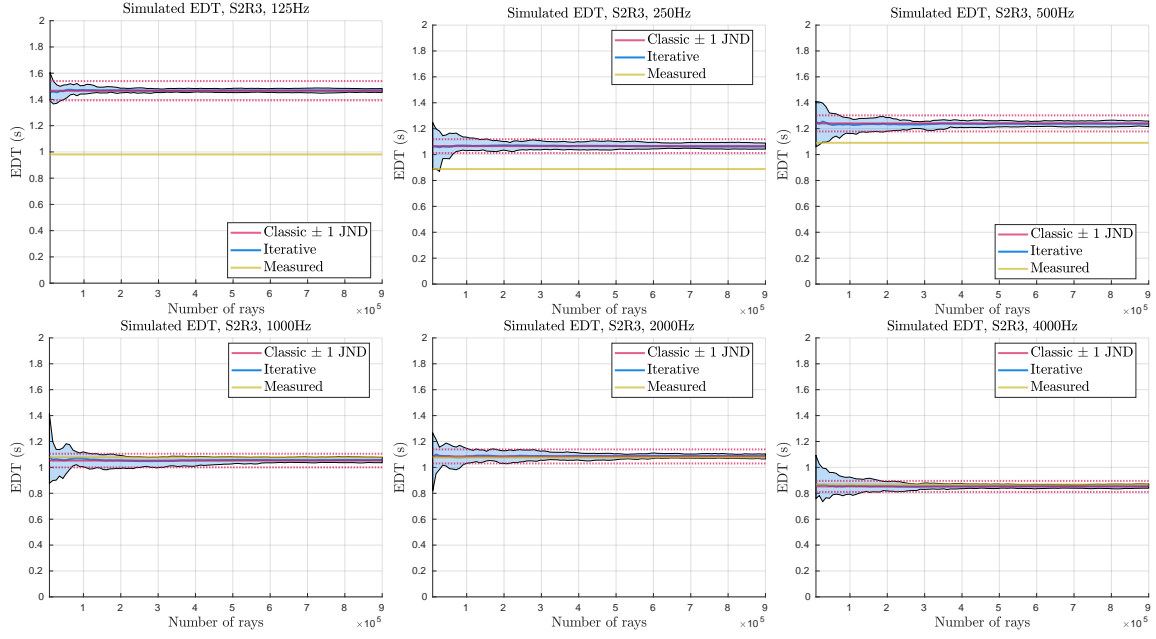

## S2R4

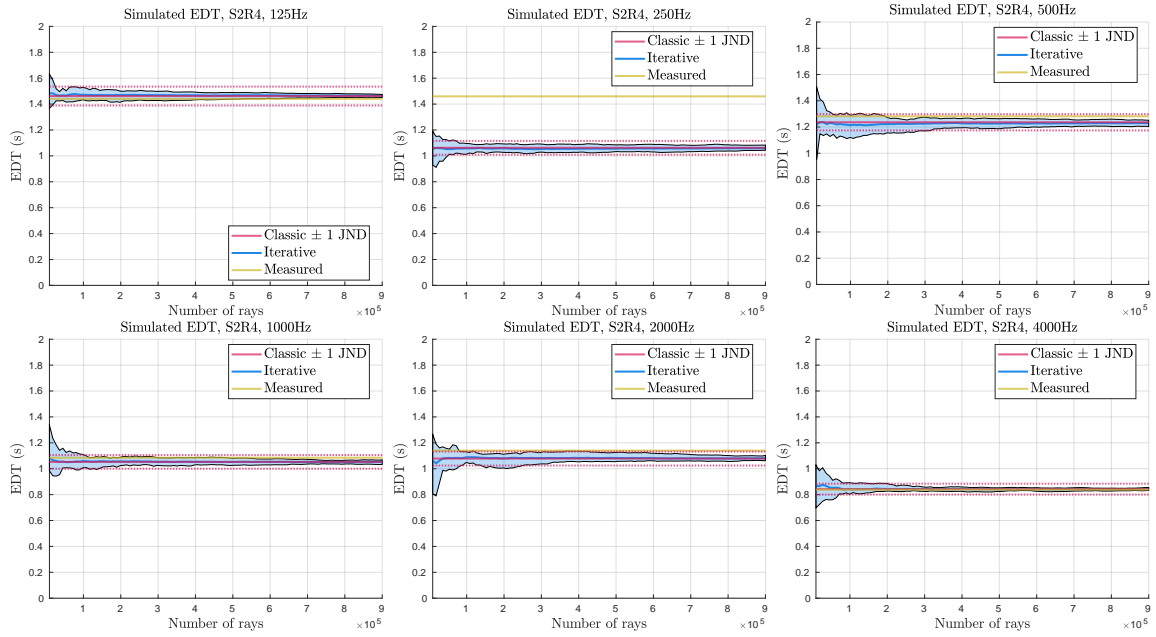

## 10 Speech clarity

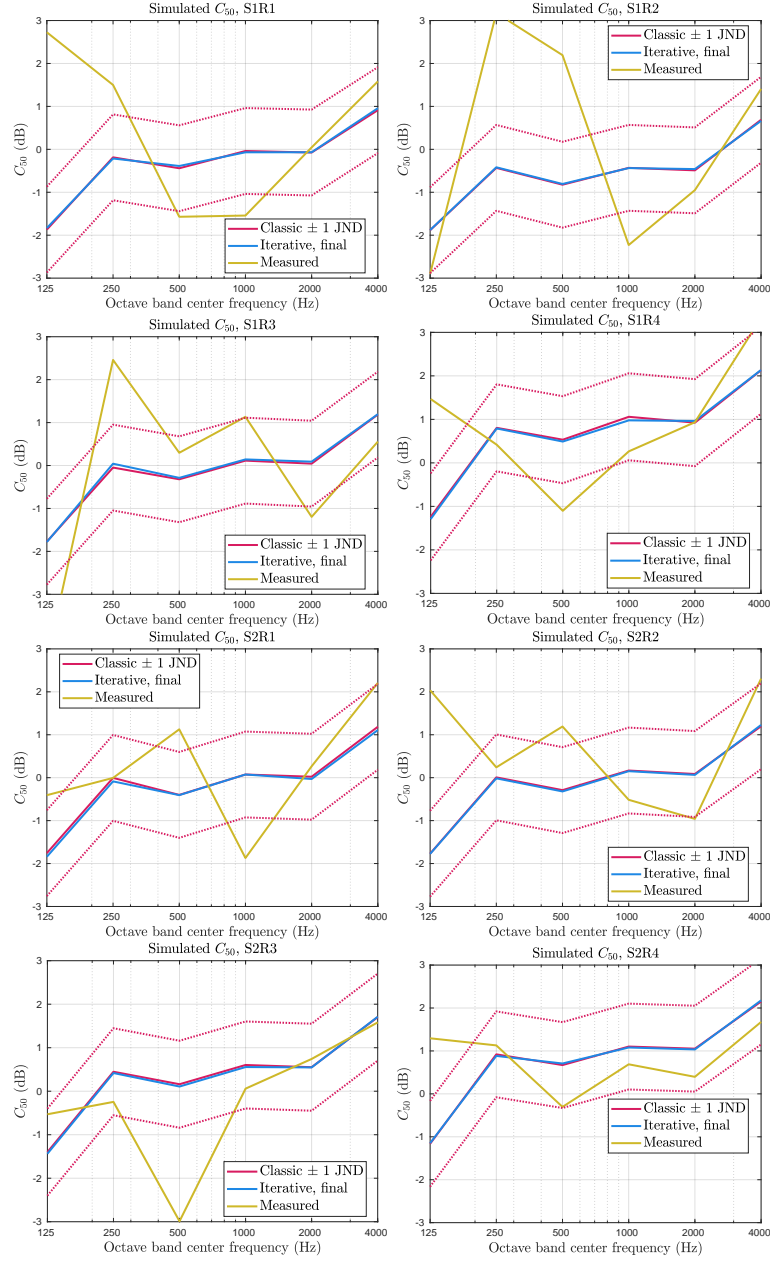

# 11 Speech clarity to number of rays

## S1R1

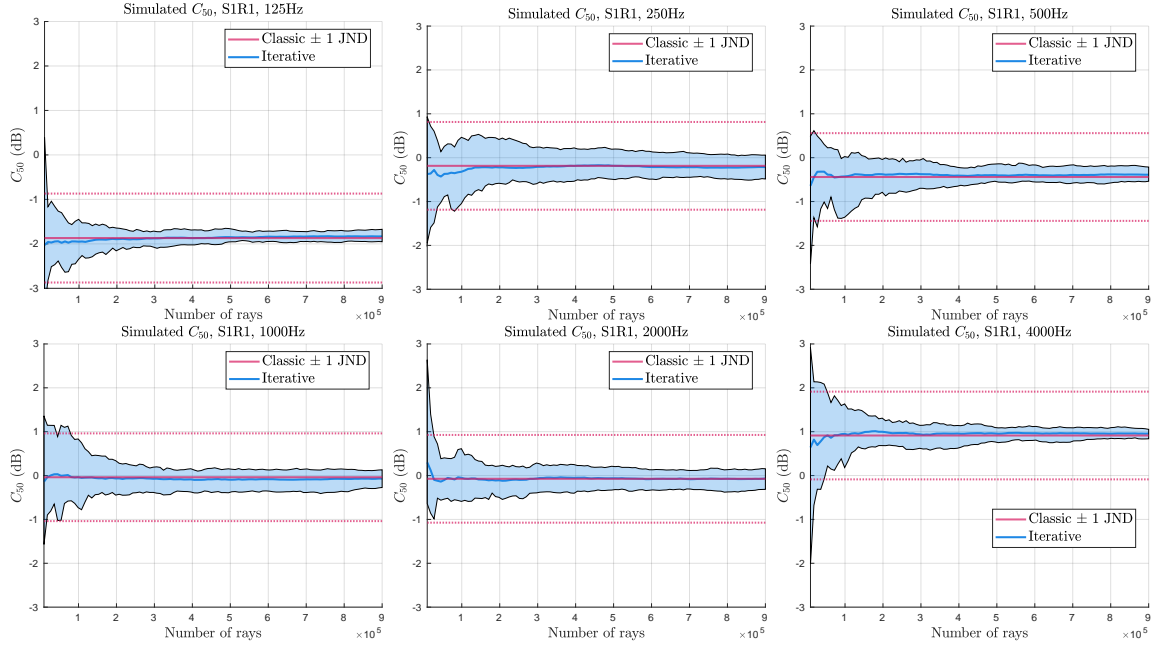

## S1R2

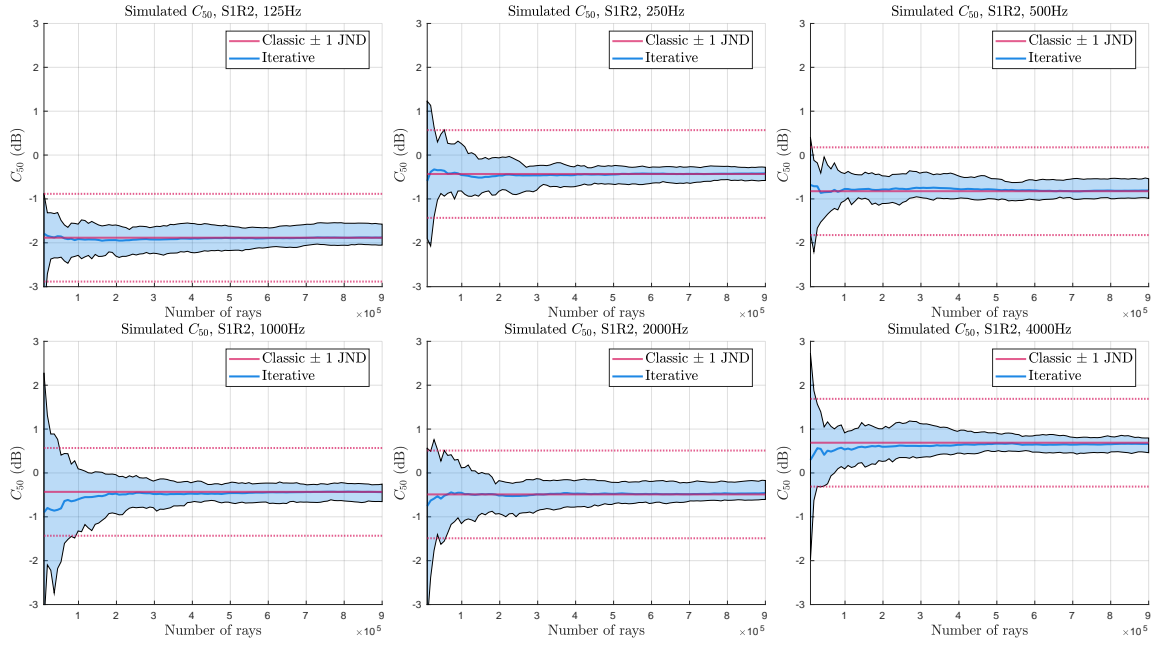

## S1R3

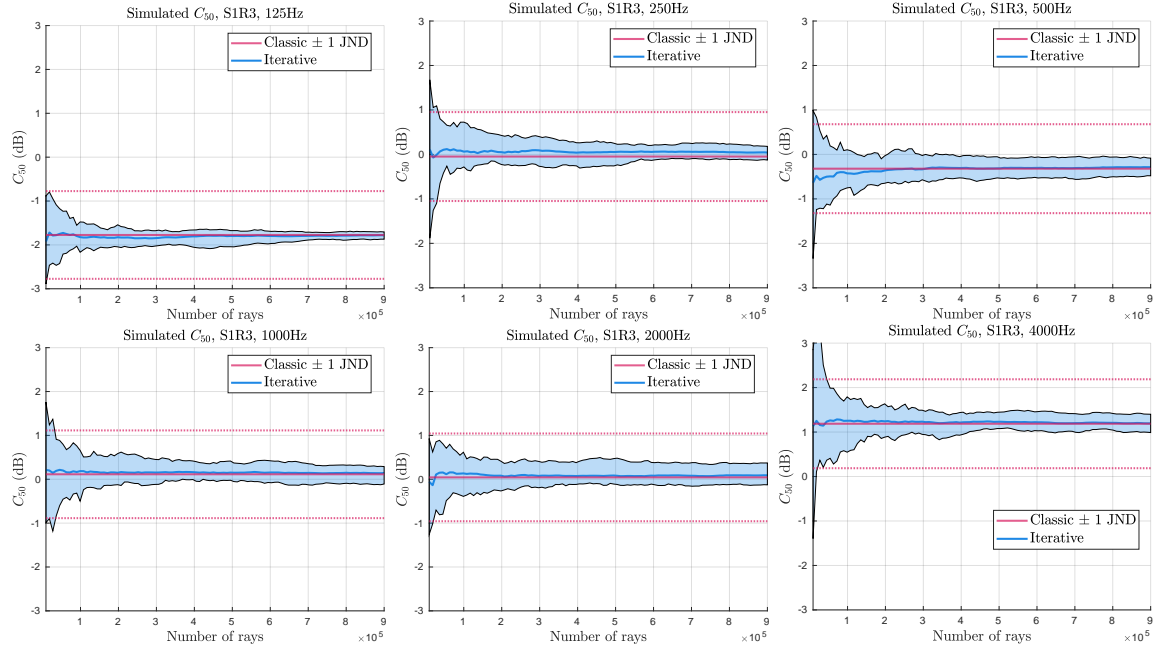

## S1R4

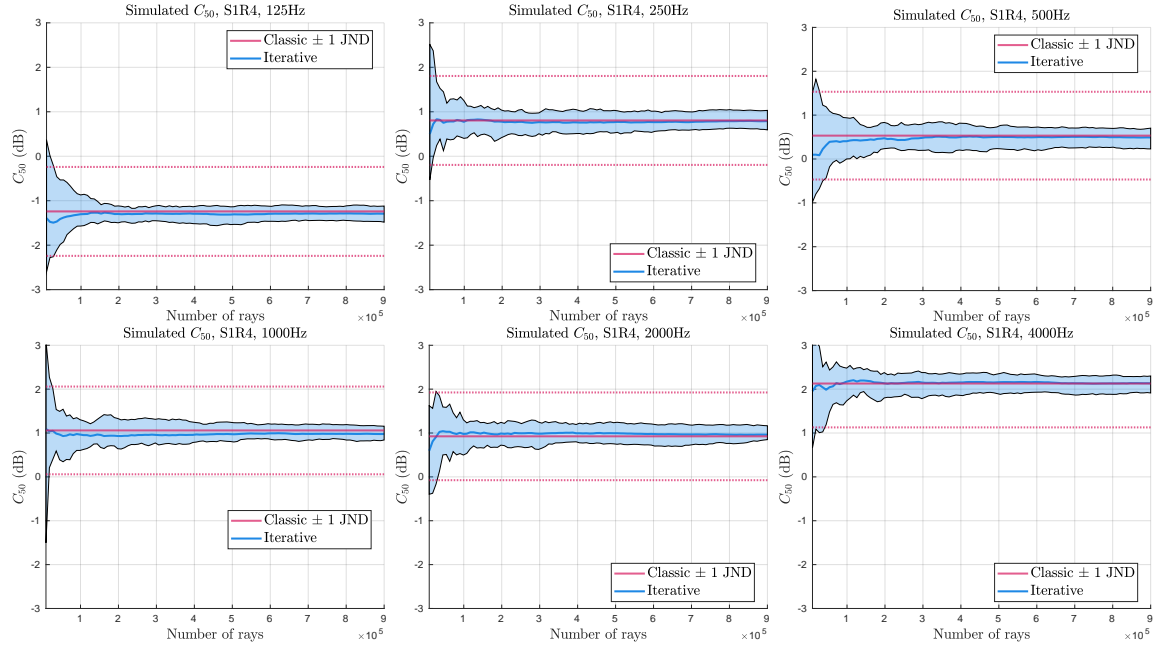

## S2R1

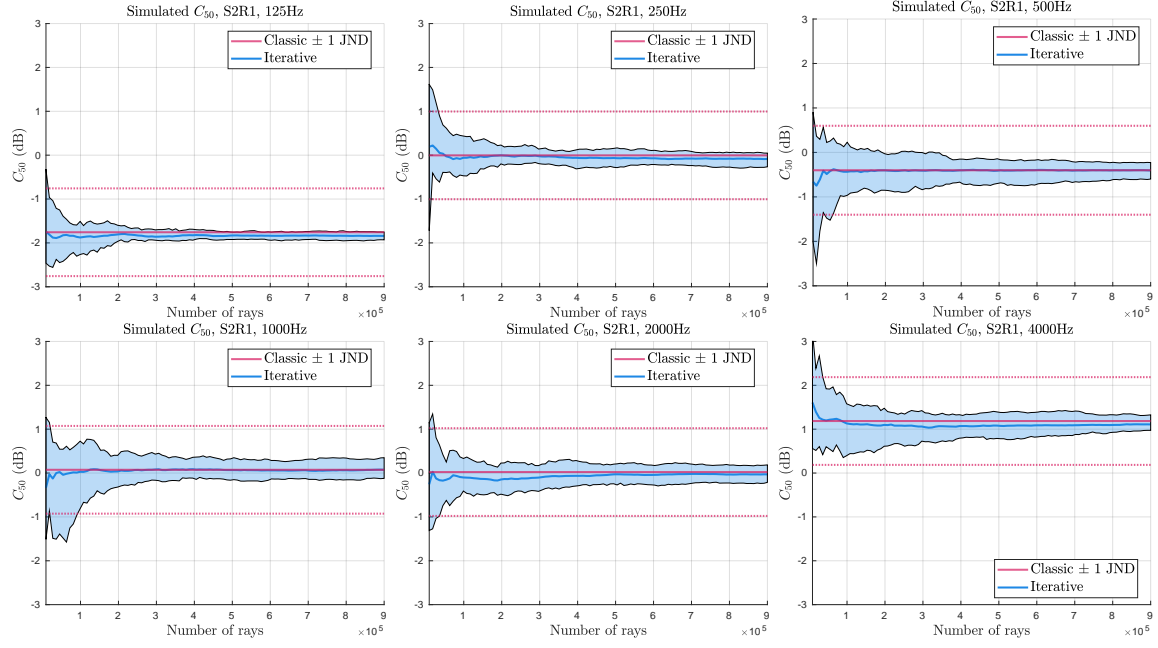

## S2R2

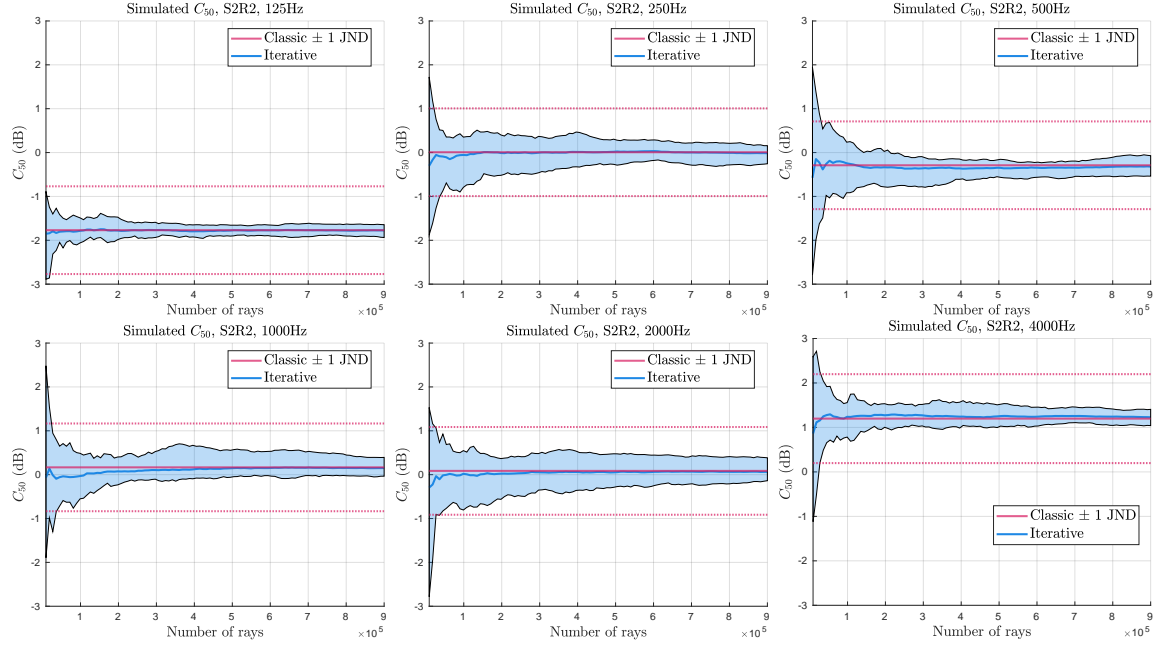

## S2R3

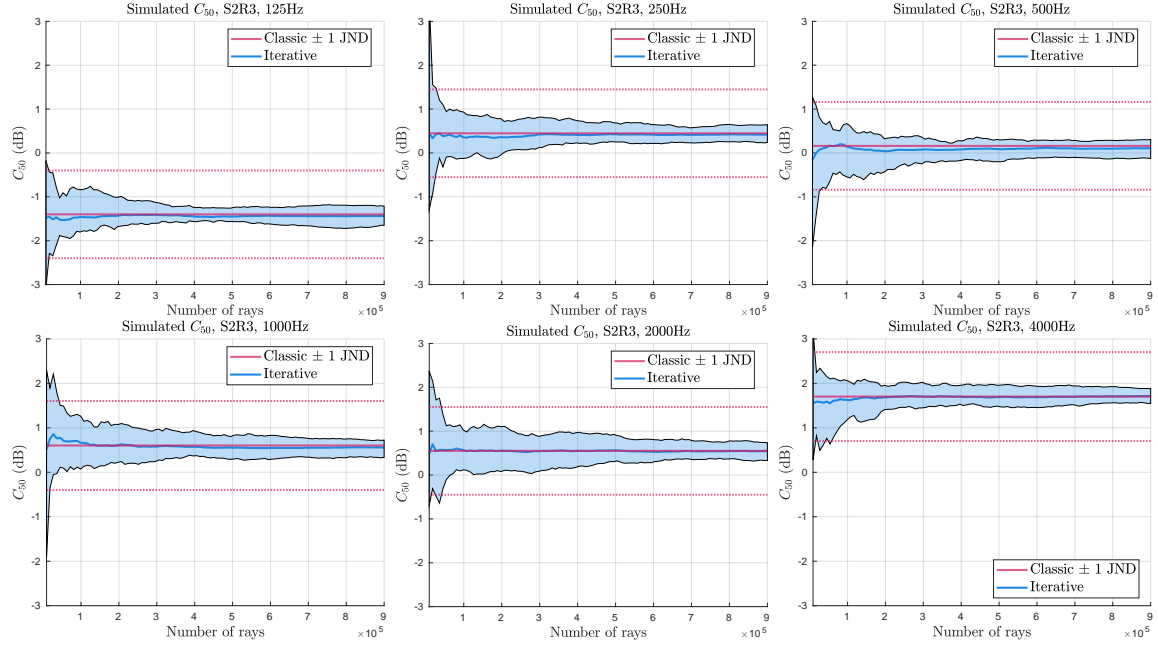

## S2R4

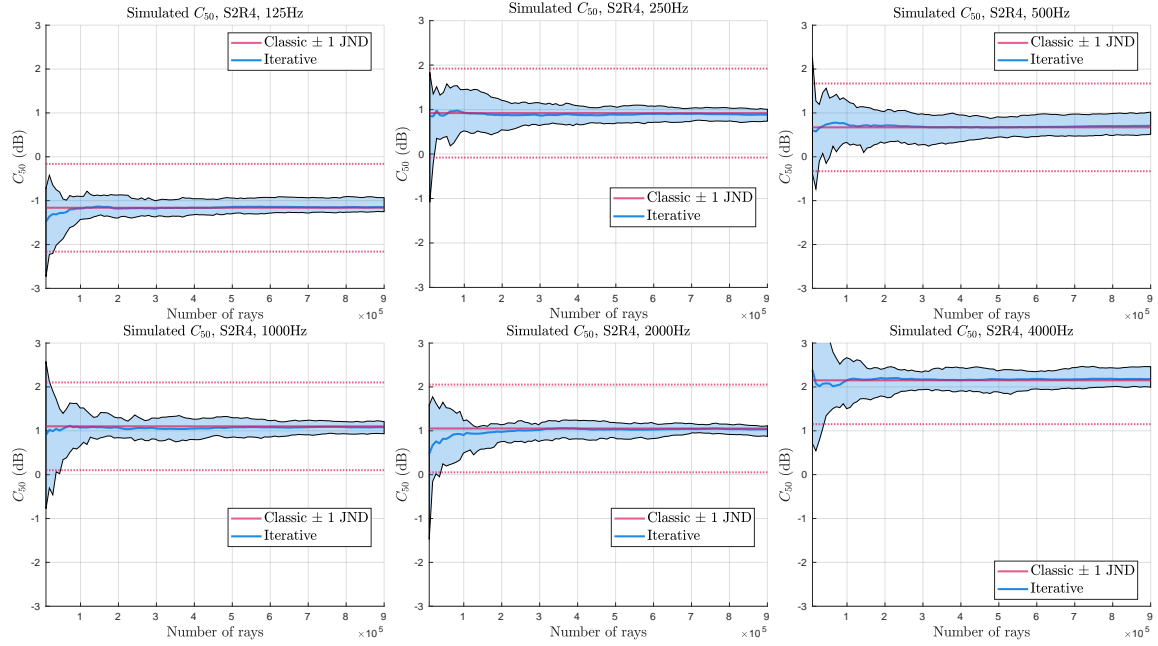

Supplement: s1 [file s1]
